# Supplementary material for: Tumor-associated macrophages derived CCL18 promotes metastasis in squamous cell carcinoma of the head and neck
Source: Cancer Cell Int. 2018 Aug 28;18:120. doi: 10.1186/s12935-018-0620-1 (PMC6114178; doi:10.1186/s12935-018-0620-1)
Supplement: Supplementary file 3 — Additional file 3. KEGG pathway enrichment analysis for the DEGs [file 12935_2018_620_MOESM3_ESM.xls]

##Databases: KEGG PATHWAY
##Statistical test method: hypergeometric test / Fisher's exact test
##FDR correction method: Benjamini and Hochberg
#Term	Database	ID	Input number	Background number	P-Value	Corrected P-Value	Input	KEGG_ID/KO	Entrez_ID	Hyperlink
Colorectal cancer	KEGG PATHWAY	hsa05210	12	62	2.53755719359e-05	0.00601401054881	ENSG00000076242|ENSG00000107643|ENSG00000067560|ENSG00000136997|ENSG00000160271|ENSG00000106799|ENSG00000142208|ENSG00000134982|ENSG00000081059|ENSG00000116062|ENSG00000095002|ENSG00000163513	hsa:4292|hsa:5599|hsa:387|hsa:4609|hsa:5900|hsa:7046|hsa:207|hsa:324|hsa:6932|hsa:2956|hsa:4436|hsa:7048|	4292|5599|387|4609|5900|7046|207|324|6932|2956|4436|7048|	http://www.genome.jp/kegg-bin/show_pathway?hsa05210/hsa:5900%09red/hsa:2956%09red/hsa:324%09red/hsa:5599%09red/hsa:4292%09red/hsa:7046%09red/hsa:4436%09red/hsa:4609%09red/hsa:6932%09red/hsa:207%09red/hsa:387%09red/hsa:7048%09red
RIG-I-like receptor signaling pathway	KEGG PATHWAY	hsa04622	9	70	0.00341596521887	0.404791878436	ENSG00000131323|ENSG00000185507|ENSG00000107643|ENSG00000083799|ENSG00000160703|ENSG00000137275|ENSG00000109320|ENSG00000163512|ENSG00000068308	hsa:7187|hsa:3665|hsa:5599|hsa:1540|hsa:79671|hsa:8737|hsa:4790|hsa:64343|hsa:55593|	7187|3665|5599|1540|79671|8737|4790|64343|55593|	http://www.genome.jp/kegg-bin/show_pathway?hsa04622/hsa:3665%09red/hsa:55593%09red/hsa:4790%09red/hsa:79671%09red/hsa:5599%09red/hsa:64343%09red/hsa:8737%09red/hsa:1540%09red/hsa:7187%09red
Longevity regulating pathway - multiple species	KEGG PATHWAY	hsa04213	8	64	0.00655990513955	0.41841793101	ENSG00000181929|ENSG00000106617|ENSG00000142208|ENSG00000108443|ENSG00000204389|ENSG00000138031|ENSG00000118689|ENSG00000196591	hsa:5571|hsa:51422|hsa:207|hsa:6198|hsa:3304|hsa:109|hsa:2309|hsa:3066|	5571|51422|207|6198|3304|109|2309|3066|	http://www.genome.jp/kegg-bin/show_pathway?hsa04213/hsa:6198%09red/hsa:51422%09red/hsa:5571%09red/hsa:3304%09red/hsa:3066%09red/hsa:109%09red/hsa:207%09red/hsa:2309%09red
Longevity regulating pathway	KEGG PATHWAY	hsa04211	10	94	0.00706190600861	0.41841793101	ENSG00000175224|ENSG00000181929|ENSG00000106617|ENSG00000142208|ENSG00000004660|ENSG00000108443|ENSG00000138031|ENSG00000023287|ENSG00000118689|ENSG00000109320	hsa:9776|hsa:5571|hsa:51422|hsa:207|hsa:84254|hsa:6198|hsa:109|hsa:9821|hsa:2309|hsa:4790|	9776|5571|51422|207|84254|6198|109|9821|2309|4790|	http://www.genome.jp/kegg-bin/show_pathway?hsa04211/hsa:6198%09red/hsa:5571%09red/hsa:4790%09red/hsa:51422%09red/hsa:84254%09red/hsa:9821%09red/hsa:109%09red/hsa:207%09red/hsa:9776%09red/hsa:2309%09red
Glycosaminoglycan biosynthesis - chondroitin sulfate / dermatan sulfate	KEGG PATHWAY	hsa00532	4	20	0.0127641272282	0.511471355405	ENSG00000171310|ENSG00000015532|ENSG00000136213|ENSG00000182022	hsa:50515|hsa:64132|hsa:55501|hsa:51363|	50515|64132|55501|51363|	http://www.genome.jp/kegg-bin/show_pathway?hsa00532/hsa:55501%09red/hsa:51363%09red/hsa:50515%09red/hsa:64132%09red
Neurotrophin signaling pathway	KEGG PATHWAY	hsa04722	11	120	0.012948641909	0.511471355405	ENSG00000178188|ENSG00000107643|ENSG00000067560|ENSG00000141522|ENSG00000134243|ENSG00000078900|ENSG00000142208|ENSG00000118689|ENSG00000198668|ENSG00000148660|ENSG00000109320	hsa:25970|hsa:5599|hsa:387|hsa:396|hsa:6272|hsa:7161|hsa:207|hsa:2309|hsa:805|hsa:818|hsa:4790|	25970|5599|387|396|6272|7161|207|2309|805|818|4790|	http://www.genome.jp/kegg-bin/show_pathway?hsa04722/hsa:805%09red/hsa:818%09red/hsa:6272%09red/hsa:5599%09red/hsa:7161%09red/hsa:25970%09red/hsa:4790%09red/hsa:396%09red/hsa:207%09red/hsa:387%09red/hsa:2309%09red
Endometrial cancer	KEGG PATHWAY	hsa05213	6	52	0.0242409233425	0.751515052602	ENSG00000076242|ENSG00000134982|ENSG00000142208|ENSG00000136997|ENSG00000081059|ENSG00000118689	hsa:4292|hsa:324|hsa:207|hsa:4609|hsa:6932|hsa:2309|	4292|324|207|4609|6932|2309|	http://www.genome.jp/kegg-bin/show_pathway?hsa05213/hsa:207%09red/hsa:4609%09red/hsa:6932%09red/hsa:324%09red/hsa:4292%09red/hsa:2309%09red
Glucagon signaling pathway	KEGG PATHWAY	hsa04922	9	102	0.0284030443728	0.751515052602	ENSG00000181929|ENSG00000106617|ENSG00000142208|ENSG00000148660|ENSG00000186951|ENSG00000275052|ENSG00000278540|ENSG00000198668|ENSG00000138814	hsa:5571|hsa:51422|hsa:207|hsa:818|hsa:5465|hsa:57223|hsa:31|hsa:805|hsa:5530|	5571|51422|207|818|5465|57223|31|805|5530|	http://www.genome.jp/kegg-bin/show_pathway?hsa04922/hsa:31%09red/hsa:805%09red/hsa:5530%09red/hsa:818%09red/hsa:5571%09red/hsa:57223%09red/hsa:51422%09red/hsa:5465%09red/hsa:207%09red
Adipocytokine signaling pathway	KEGG PATHWAY	hsa04920	7	70	0.0293764002963	0.751515052602	ENSG00000181929|ENSG00000107643|ENSG00000106617|ENSG00000142208|ENSG00000004660|ENSG00000186951|ENSG00000109320	hsa:5571|hsa:5599|hsa:51422|hsa:207|hsa:84254|hsa:5465|hsa:4790|	5571|5599|51422|207|84254|5465|4790|	http://www.genome.jp/kegg-bin/show_pathway?hsa04920/hsa:5571%09red/hsa:4790%09red/hsa:51422%09red/hsa:84254%09red/hsa:5599%09red/hsa:5465%09red/hsa:207%09red
Tight junction	KEGG PATHWAY	hsa04530	11	139	0.0317094958904	0.751515052602	ENSG00000132849|ENSG00000067560|ENSG00000074211|ENSG00000197694|ENSG00000104067|ENSG00000142208|ENSG00000137221|ENSG00000079819|ENSG00000067606|ENSG00000159023|ENSG00000116539	hsa:10207|hsa:387|hsa:5522|hsa:6709|hsa:7082|hsa:207|hsa:93643|hsa:2037|hsa:5590|hsa:2035|hsa:55870|	10207|387|5522|6709|7082|207|93643|2037|5590|2035|55870|	http://www.genome.jp/kegg-bin/show_pathway?hsa04530/hsa:2035%09red/hsa:7082%09red/hsa:2037%09red/hsa:5590%09red/hsa:93643%09red/hsa:10207%09red/hsa:5522%09red/hsa:6709%09red/hsa:55870%09red/hsa:207%09red/hsa:387%09red
Pathways in cancer	KEGG PATHWAY	hsa05200	24	397	0.0389371781132	0.838919201166	ENSG00000131323|ENSG00000138031|ENSG00000116062|ENSG00000101966|ENSG00000106799|ENSG00000196591|ENSG00000095002|ENSG00000163513|ENSG00000108094|ENSG00000160271|ENSG00000142208|ENSG00000172354|ENSG00000100644|ENSG00000076242|ENSG00000067560|ENSG00000114354|ENSG00000107643|ENSG00000134982|ENSG00000134318|ENSG00000066468|ENSG00000109320|ENSG00000136997|ENSG00000081059|ENSG00000053747	hsa:7187|hsa:109|hsa:2956|hsa:331|hsa:7046|hsa:3066|hsa:4436|hsa:7048|hsa:8453|hsa:5900|hsa:207|hsa:2783|hsa:3091|hsa:4292|hsa:387|hsa:10342|hsa:5599|hsa:324|hsa:9475|hsa:2263|hsa:4790|hsa:4609|hsa:6932|hsa:3909|	7187|109|2956|331|7046|3066|4436|7048|8453|5900|207|2783|3091|4292|387|10342|5599|324|9475|2263|4790|4609|6932|3909|	http://www.genome.jp/kegg-bin/show_pathway?hsa05200/hsa:331%09red/hsa:6932%09red/hsa:5900%09red/hsa:207%09red/hsa:3091%09red/hsa:3066%09red/hsa:109%09red/hsa:7187%09red/hsa:8453%09red/hsa:10342%09red/hsa:2783%09red/hsa:5599%09red/hsa:9475%09red/hsa:4790%09red/hsa:324%09red/hsa:4292%09red/hsa:3909%09red/hsa:2956%09red/hsa:4436%09red/hsa:387%09red/hsa:7046%09red/hsa:2263%09red/hsa:4609%09red/hsa:70…
Hepatitis C	KEGG PATHWAY	hsa05160	10	133	0.0514469559613	0.86763995998	ENSG00000131467|ENSG00000074211|ENSG00000131323|ENSG00000185507|ENSG00000137275|ENSG00000130164|ENSG00000142208|ENSG00000107643|ENSG00000186951|ENSG00000109320	hsa:10197|hsa:5522|hsa:7187|hsa:3665|hsa:8737|hsa:3949|hsa:207|hsa:5599|hsa:5465|hsa:4790|	10197|5522|7187|3665|8737|3949|207|5599|5465|4790|	http://www.genome.jp/kegg-bin/show_pathway?hsa05160/hsa:5522%09red/hsa:3665%09red/hsa:3949%09red/hsa:4790%09red/hsa:10197%09red/hsa:5599%09red/hsa:5465%09red/hsa:8737%09red/hsa:207%09red/hsa:7187%09red
Phosphatidylinositol signaling system	KEGG PATHWAY	hsa04070	8	98	0.0534056404875	0.86763995998	ENSG00000176095|ENSG00000087053|ENSG00000065357|ENSG00000078269|ENSG00000100605|ENSG00000149091|ENSG00000068745|ENSG00000198668	hsa:9807|hsa:8898|hsa:1606|hsa:8871|hsa:3705|hsa:8525|hsa:51447|hsa:805|	9807|8898|1606|8871|3705|8525|51447|805|	http://www.genome.jp/kegg-bin/show_pathway?hsa04070/hsa:805%09red/hsa:51447%09red/hsa:9807%09red/hsa:1606%09red/hsa:3705%09red/hsa:8871%09red/hsa:8898%09red/hsa:8525%09red
Pancreatic cancer	KEGG PATHWAY	hsa05212	6	66	0.0598740521626	0.86763995998	ENSG00000107643|ENSG00000160271|ENSG00000106799|ENSG00000142208|ENSG00000109320|ENSG00000163513	hsa:5599|hsa:5900|hsa:7046|hsa:207|hsa:4790|hsa:7048|	5599|5900|7046|207|4790|7048|	http://www.genome.jp/kegg-bin/show_pathway?hsa05212/hsa:5900%09red/hsa:4790%09red/hsa:7046%09red/hsa:5599%09red/hsa:207%09red/hsa:7048%09red
TGF-beta signaling pathway	KEGG PATHWAY	hsa04350	7	84	0.0627842775412	0.86763995998	ENSG00000067560|ENSG00000106799|ENSG00000108443|ENSG00000136997|ENSG00000118707|ENSG00000039319|ENSG00000163513	hsa:387|hsa:7046|hsa:6198|hsa:4609|hsa:60436|hsa:9765|hsa:7048|	387|7046|6198|4609|60436|9765|7048|	http://www.genome.jp/kegg-bin/show_pathway?hsa04350/hsa:6198%09red/hsa:60436%09red/hsa:9765%09red/hsa:7046%09red/hsa:4609%09red/hsa:387%09red/hsa:7048%09red
MAPK signaling pathway	KEGG PATHWAY	hsa04010	16	255	0.0629052285607	0.86763995998	ENSG00000011566|ENSG00000138166|ENSG00000107643|ENSG00000111266|ENSG00000106799|ENSG00000142208|ENSG00000204389|ENSG00000130829|ENSG00000114738|ENSG00000136997|ENSG00000160867|ENSG00000066468|ENSG00000163513|ENSG00000204209|ENSG00000138814|ENSG00000109320	hsa:8491|hsa:1847|hsa:5599|hsa:80824|hsa:7046|hsa:207|hsa:3304|hsa:1852|hsa:7867|hsa:4609|hsa:2264|hsa:2263|hsa:7048|hsa:1616|hsa:5530|hsa:4790|	8491|1847|5599|80824|7046|207|3304|1852|7867|4609|2264|2263|7048|1616|5530|4790|	http://www.genome.jp/kegg-bin/show_pathway?hsa04010/hsa:5530%09red/hsa:4790%09red/hsa:1616%09red/hsa:8491%09red/hsa:3304%09red/hsa:1847%09red/hsa:2264%09red/hsa:7046%09red/hsa:7867%09red/hsa:4609%09red/hsa:5599%09red/hsa:80824%09red/hsa:2263%09red/hsa:1852%09red/hsa:207%09red/hsa:7048%09red
Endocytosis	KEGG PATHWAY	hsa04144	16	260	0.0714639221939	0.86763995998	ENSG00000176783|ENSG00000151693|ENSG00000049759|ENSG00000067560|ENSG00000156011|ENSG00000130164|ENSG00000106799|ENSG00000157985|ENSG00000198055|ENSG00000204389|ENSG00000160867|ENSG00000066468|ENSG00000039319|ENSG00000156675|ENSG00000067606|ENSG00000163513	hsa:80230|hsa:8853|hsa:23327|hsa:387|hsa:23362|hsa:3949|hsa:7046|hsa:116987|hsa:2870|hsa:3304|hsa:2264|hsa:2263|hsa:9765|hsa:80223|hsa:5590|hsa:7048|	80230|8853|23327|387|23362|3949|7046|116987|2870|3304|2264|2263|9765|80223|5590|7048|	http://www.genome.jp/kegg-bin/show_pathway?hsa04144/hsa:80223%09red/hsa:2870%09red/hsa:116987%09red/hsa:3949%09red/hsa:80230%09red/hsa:5590%09red/hsa:3304%09red/hsa:8853%09red/hsa:2263%09red/hsa:387%09red/hsa:2264%09red/hsa:7046%09red/hsa:23362%09red/hsa:9765%09red/hsa:23327%09red/hsa:7048%09red
AMPK signaling pathway	KEGG PATHWAY	hsa04152	9	125	0.0763093081397	0.86763995998	ENSG00000065882|ENSG00000181929|ENSG00000074211|ENSG00000106617|ENSG00000142208|ENSG00000004660|ENSG00000108443|ENSG00000278540|ENSG00000118689	hsa:23216|hsa:5571|hsa:5522|hsa:51422|hsa:207|hsa:84254|hsa:6198|hsa:31|hsa:2309|	23216|5571|5522|51422|207|84254|6198|31|2309|	http://www.genome.jp/kegg-bin/show_pathway?hsa04152/hsa:31%09red/hsa:5522%09red/hsa:6198%09red/hsa:5571%09red/hsa:51422%09red/hsa:84254%09red/hsa:23216%09red/hsa:207%09red/hsa:2309%09red
Mismatch repair	KEGG PATHWAY	hsa03430	3	23	0.0776376026922	0.86763995998	ENSG00000076242|ENSG00000095002|ENSG00000116062	hsa:4292|hsa:4436|hsa:2956|	4292|4436|2956|	http://www.genome.jp/kegg-bin/show_pathway?hsa03430/hsa:2956%09red/hsa:4436%09red/hsa:4292%09red
Epstein-Barr virus infection	KEGG PATHWAY	hsa05169	13	204	0.0798634472115	0.86763995998	ENSG00000131323|ENSG00000137275|ENSG00000136997|ENSG00000173692|ENSG00000058600|ENSG00000142208|ENSG00000204389|ENSG00000175166|ENSG00000116815|ENSG00000168214|ENSG00000109320|ENSG00000196591|ENSG00000107643	hsa:7187|hsa:8737|hsa:4609|hsa:5707|hsa:55718|hsa:207|hsa:3304|hsa:5708|hsa:965|hsa:3516|hsa:4790|hsa:3066|hsa:5599|	7187|8737|4609|5707|55718|207|3304|5708|965|3516|4790|3066|5599|	http://www.genome.jp/kegg-bin/show_pathway?hsa05169/hsa:3516%09red/hsa:3304%09red/hsa:965%09red/hsa:5599%09red/hsa:55718%09red/hsa:4609%09red/hsa:4790%09red/hsa:5708%09red/hsa:3066%09red/hsa:5707%09red/hsa:8737%09red/hsa:207%09red/hsa:7187%09red
Pathogenic Escherichia coli infection	KEGG PATHWAY	hsa05130	5	55	0.0821188016449	0.86763995998	ENSG00000158092|ENSG00000092820|ENSG00000127824|ENSG00000134318|ENSG00000067560	hsa:4690|hsa:7430|hsa:7277|hsa:9475|hsa:387|	4690|7430|7277|9475|387|	http://www.genome.jp/kegg-bin/show_pathway?hsa05130/hsa:9475%09red/hsa:7430%09red/hsa:4690%09red/hsa:387%09red/hsa:7277%09red
Insulin resistance	KEGG PATHWAY	hsa04931	8	109	0.0843081304773	0.86763995998	ENSG00000181929|ENSG00000107643|ENSG00000106617|ENSG00000142208|ENSG00000108443|ENSG00000186951|ENSG00000067606|ENSG00000109320	hsa:5571|hsa:5599|hsa:51422|hsa:207|hsa:6198|hsa:5465|hsa:5590|hsa:4790|	5571|5599|51422|207|6198|5465|5590|4790|	http://www.genome.jp/kegg-bin/show_pathway?hsa04931/hsa:6198%09red/hsa:5590%09red/hsa:5571%09red/hsa:4790%09red/hsa:51422%09red/hsa:5599%09red/hsa:5465%09red/hsa:207%09red
Chronic myeloid leukemia	KEGG PATHWAY	hsa05220	6	73	0.0854257612198	0.86763995998	ENSG00000106799|ENSG00000142208|ENSG00000136997|ENSG00000109320|ENSG00000196591|ENSG00000163513	hsa:7046|hsa:207|hsa:4609|hsa:4790|hsa:3066|hsa:7048|	7046|207|4609|4790|3066|7048|	http://www.genome.jp/kegg-bin/show_pathway?hsa05220/hsa:4790%09red/hsa:7046%09red/hsa:3066%09red/hsa:4609%09red/hsa:207%09red/hsa:7048%09red
Adherens junction	KEGG PATHWAY	hsa04520	6	74	0.0894988909849	0.86763995998	ENSG00000067560|ENSG00000140575|ENSG00000106799|ENSG00000104067|ENSG00000081059|ENSG00000163513	hsa:387|hsa:8826|hsa:7046|hsa:7082|hsa:6932|hsa:7048|	387|8826|7046|7082|6932|7048|	http://www.genome.jp/kegg-bin/show_pathway?hsa04520/hsa:7082%09red/hsa:8826%09red/hsa:7046%09red/hsa:6932%09red/hsa:387%09red/hsa:7048%09red
Acute myeloid leukemia	KEGG PATHWAY	hsa05221	5	57	0.0915232025296	0.86763995998	ENSG00000136997|ENSG00000109320|ENSG00000142208|ENSG00000108443|ENSG00000081059	hsa:4609|hsa:4790|hsa:207|hsa:6198|hsa:6932|	4609|4790|207|6198|6932|	http://www.genome.jp/kegg-bin/show_pathway?hsa05221/hsa:4609%09red/hsa:6932%09red/hsa:207%09red/hsa:4790%09red/hsa:6198%09red
Non-homologous end-joining	KEGG PATHWAY	hsa03450	2	13	0.112665246822	0.879695314255	ENSG00000253729|ENSG00000166169	hsa:5591|hsa:27343|	5591|27343|	http://www.genome.jp/kegg-bin/show_pathway?hsa03450/hsa:27343%09red/hsa:5591%09red
Ubiquitin mediated proteolysis	KEGG PATHWAY	hsa04120	9	137	0.11393891122	0.879695314255	ENSG00000049759|ENSG00000170142|ENSG00000101871|ENSG00000101966|ENSG00000003096|ENSG00000108094|ENSG00000158290|ENSG00000109332|ENSG00000104343	hsa:23327|hsa:7324|hsa:4281|hsa:331|hsa:90293|hsa:8453|hsa:8450|hsa:7323|hsa:55284|	23327|7324|4281|331|90293|8453|8450|7323|55284|	http://www.genome.jp/kegg-bin/show_pathway?hsa04120/hsa:90293%09red/hsa:23327%09red/hsa:8450%09red/hsa:7324%09red/hsa:7323%09red/hsa:331%09red/hsa:55284%09red/hsa:4281%09red/hsa:8453%09red
Vasopressin-regulated water reabsorption	KEGG PATHWAY	hsa04962	4	44	0.114105407364	0.879695314255	ENSG00000175203|ENSG00000187240|ENSG00000138031|ENSG00000141522	hsa:10540|hsa:79659|hsa:109|hsa:396|	10540|79659|109|396|	http://www.genome.jp/kegg-bin/show_pathway?hsa04962/hsa:109%09red/hsa:79659%09red/hsa:396%09red/hsa:10540%09red
Insulin signaling pathway	KEGG PATHWAY	hsa04910	9	139	0.121057142423	0.879695314255	ENSG00000181929|ENSG00000107643|ENSG00000106617|ENSG00000142208|ENSG00000108443|ENSG00000182473|ENSG00000278540|ENSG00000198668|ENSG00000067606	hsa:5571|hsa:5599|hsa:51422|hsa:207|hsa:6198|hsa:23265|hsa:31|hsa:805|hsa:5590|	5571|5599|51422|207|6198|23265|31|805|5590|	http://www.genome.jp/kegg-bin/show_pathway?hsa04910/hsa:31%09red/hsa:805%09red/hsa:6198%09red/hsa:5590%09red/hsa:5571%09red/hsa:5599%09red/hsa:51422%09red/hsa:23265%09red/hsa:207%09red
Apoptosis	KEGG PATHWAY	hsa04210	9	140	0.124704576926	0.879695314255	ENSG00000137275|ENSG00000101966|ENSG00000197694|ENSG00000142208|ENSG00000164733|ENSG00000107643|ENSG00000204209|ENSG00000127824|ENSG00000109320	hsa:8737|hsa:331|hsa:6709|hsa:207|hsa:1508|hsa:5599|hsa:1616|hsa:7277|hsa:4790|	8737|331|6709|207|1508|5599|1616|7277|4790|	http://www.genome.jp/kegg-bin/show_pathway?hsa04210/hsa:1616%09red/hsa:1508%09red/hsa:7277%09red/hsa:4790%09red/hsa:5599%09red/hsa:6709%09red/hsa:331%09red/hsa:8737%09red/hsa:207%09red
Thyroid cancer	KEGG PATHWAY	hsa05216	3	29	0.125386206784	0.879695314255	ENSG00000114354|ENSG00000136997|ENSG00000081059	hsa:10342|hsa:4609|hsa:6932|	10342|4609|6932|	http://www.genome.jp/kegg-bin/show_pathway?hsa05216/hsa:4609%09red/hsa:6932%09red/hsa:10342%09red
AGE-RAGE signaling pathway in diabetic complications	KEGG PATHWAY	hsa04933	7	101	0.125615785508	0.879695314255	ENSG00000108691|ENSG00000107643|ENSG00000106799|ENSG00000142208|ENSG00000163513|ENSG00000067606|ENSG00000109320	hsa:6347|hsa:5599|hsa:7046|hsa:207|hsa:7048|hsa:5590|hsa:4790|	6347|5599|7046|207|7048|5590|4790|	http://www.genome.jp/kegg-bin/show_pathway?hsa04933/hsa:5590%09red/hsa:4790%09red/hsa:6347%09red/hsa:7046%09red/hsa:5599%09red/hsa:207%09red/hsa:7048%09red
Choline metabolism in cancer	KEGG PATHWAY	hsa05231	7	101	0.125615785508	0.879695314255	ENSG00000107643|ENSG00000160271|ENSG00000142208|ENSG00000108443|ENSG00000065357|ENSG00000149091|ENSG00000100644	hsa:5599|hsa:5900|hsa:207|hsa:6198|hsa:1606|hsa:8525|hsa:3091|	5599|5900|207|6198|1606|8525|3091|	http://www.genome.jp/kegg-bin/show_pathway?hsa05231/hsa:5900%09red/hsa:6198%09red/hsa:1606%09red/hsa:5599%09red/hsa:8525%09red/hsa:207%09red/hsa:3091%09red
Sphingolipid signaling pathway	KEGG PATHWAY	hsa04071	8	121	0.127823860857	0.879695314255	ENSG00000074211|ENSG00000107643|ENSG00000067560|ENSG00000164023|ENSG00000142208|ENSG00000134318|ENSG00000067606|ENSG00000109320	hsa:5522|hsa:5599|hsa:387|hsa:166929|hsa:207|hsa:9475|hsa:5590|hsa:4790|	5522|5599|387|166929|207|9475|5590|4790|	http://www.genome.jp/kegg-bin/show_pathway?hsa04071/hsa:5522%09red/hsa:166929%09red/hsa:5590%09red/hsa:4790%09red/hsa:9475%09red/hsa:5599%09red/hsa:207%09red/hsa:387%09red
Wnt signaling pathway	KEGG PATHWAY	hsa04310	9	143	0.135994474099	0.879695314255	ENSG00000107643|ENSG00000067560|ENSG00000136997|ENSG00000081059|ENSG00000148660|ENSG00000134982|ENSG00000134318|ENSG00000101849|ENSG00000138814	hsa:5599|hsa:387|hsa:4609|hsa:6932|hsa:818|hsa:324|hsa:9475|hsa:6907|hsa:5530|	5599|387|4609|6932|818|324|9475|6907|5530|	http://www.genome.jp/kegg-bin/show_pathway?hsa04310/hsa:5530%09red/hsa:818%09red/hsa:5599%09red/hsa:9475%09red/hsa:6907%09red/hsa:4609%09red/hsa:6932%09red/hsa:324%09red/hsa:387%09red
Chagas disease (American trypanosomiasis)	KEGG PATHWAY	hsa05142	7	104	0.139154466359	0.879695314255	ENSG00000108691|ENSG00000107643|ENSG00000074211|ENSG00000106799|ENSG00000142208|ENSG00000163513|ENSG00000109320	hsa:6347|hsa:5599|hsa:5522|hsa:7046|hsa:207|hsa:7048|hsa:4790|	6347|5599|5522|7046|207|7048|4790|	http://www.genome.jp/kegg-bin/show_pathway?hsa05142/hsa:5522%09red/hsa:4790%09red/hsa:6347%09red/hsa:7046%09red/hsa:5599%09red/hsa:207%09red/hsa:7048%09red
Notch signaling pathway	KEGG PATHWAY	hsa04330	4	48	0.141288086107	0.879695314255	ENSG00000168214|ENSG00000091073|ENSG00000196591|ENSG00000169733	hsa:3516|hsa:113878|hsa:3066|hsa:5986|	3516|113878|3066|5986|	http://www.genome.jp/kegg-bin/show_pathway?hsa04330/hsa:113878%09red/hsa:3516%09red/hsa:5986%09red/hsa:3066%09red
Small cell lung cancer	KEGG PATHWAY	hsa05222	6	86	0.146159616339	0.879695314255	ENSG00000131323|ENSG00000101966|ENSG00000142208|ENSG00000136997|ENSG00000053747|ENSG00000109320	hsa:7187|hsa:331|hsa:207|hsa:4609|hsa:3909|hsa:4790|	7187|331|207|4609|3909|4790|	http://www.genome.jp/kegg-bin/show_pathway?hsa05222/hsa:4790%09red/hsa:4609%09red/hsa:331%09red/hsa:207%09red/hsa:7187%09red/hsa:3909%09red
Salmonella infection	KEGG PATHWAY	hsa05132	6	86	0.146159616339	0.879695314255	ENSG00000107643|ENSG00000137171|ENSG00000104067|ENSG00000134318|ENSG00000187240|ENSG00000109320	hsa:5599|hsa:89953|hsa:7082|hsa:9475|hsa:79659|hsa:4790|	5599|89953|7082|9475|79659|4790|	http://www.genome.jp/kegg-bin/show_pathway?hsa05132/hsa:7082%09red/hsa:4790%09red/hsa:79659%09red/hsa:9475%09red/hsa:5599%09red/hsa:89953%09red
Toll-like receptor signaling pathway	KEGG PATHWAY	hsa04620	7	106	0.148557126356	0.879695314255	ENSG00000131323|ENSG00000185507|ENSG00000137275|ENSG00000142208|ENSG00000078902|ENSG00000107643|ENSG00000109320	hsa:7187|hsa:3665|hsa:8737|hsa:207|hsa:54472|hsa:5599|hsa:4790|	7187|3665|8737|207|54472|5599|4790|	http://www.genome.jp/kegg-bin/show_pathway?hsa04620/hsa:3665%09red/hsa:54472%09red/hsa:4790%09red/hsa:5599%09red/hsa:8737%09red/hsa:207%09red/hsa:7187%09red
Ovarian steroidogenesis	KEGG PATHWAY	hsa04913	4	50	0.155753566395	0.879695314255	ENSG00000137869|ENSG00000130164|ENSG00000140465|ENSG00000138031	hsa:1588|hsa:3949|hsa:1543|hsa:109|	1588|3949|1543|109|	http://www.genome.jp/kegg-bin/show_pathway?hsa04913/hsa:1588%09red/hsa:109%09red/hsa:3949%09red/hsa:1543%09red
ErbB signaling pathway	KEGG PATHWAY	hsa04012	6	88	0.156901120141	0.879695314255	ENSG00000158092|ENSG00000107643|ENSG00000142208|ENSG00000108443|ENSG00000136997|ENSG00000148660	hsa:4690|hsa:5599|hsa:207|hsa:6198|hsa:4609|hsa:818|	4690|5599|207|6198|4609|818|	http://www.genome.jp/kegg-bin/show_pathway?hsa04012/hsa:818%09red/hsa:6198%09red/hsa:4690%09red/hsa:5599%09red/hsa:4609%09red/hsa:207%09red
Amyotrophic lateral sclerosis (ALS)	KEGG PATHWAY	hsa05014	4	51	0.16318548378	0.879695314255	ENSG00000130204|ENSG00000204209|ENSG00000138814|ENSG00000136986	hsa:10452|hsa:1616|hsa:5530|hsa:79139|	10452|1616|5530|79139|	http://www.genome.jp/kegg-bin/show_pathway?hsa05014/hsa:79139%09red/hsa:5530%09red/hsa:1616%09red/hsa:10452%09red
TNF signaling pathway	KEGG PATHWAY	hsa04668	7	110	0.168222490067	0.879695314255	ENSG00000108691|ENSG00000131323|ENSG00000137275|ENSG00000142208|ENSG00000107643|ENSG00000087470|ENSG00000109320	hsa:6347|hsa:7187|hsa:8737|hsa:207|hsa:5599|hsa:10059|hsa:4790|	6347|7187|8737|207|5599|10059|4790|	http://www.genome.jp/kegg-bin/show_pathway?hsa04668/hsa:10059%09red/hsa:4790%09red/hsa:6347%09red/hsa:5599%09red/hsa:8737%09red/hsa:207%09red/hsa:7187%09red
Mineral absorption	KEGG PATHWAY	hsa04978	4	52	0.170742550446	0.879695314255	ENSG00000076351|ENSG00000225697|ENSG00000147804|ENSG00000070961	hsa:113235|hsa:65010|hsa:55630|hsa:490|	113235|65010|55630|490|	http://www.genome.jp/kegg-bin/show_pathway?hsa04978/hsa:490%09red/hsa:65010%09red/hsa:55630%09red/hsa:113235%09red
Lysine degradation	KEGG PATHWAY	hsa00310	4	52	0.170742550446	0.879695314255	ENSG00000164904|ENSG00000110066|ENSG00000152952|ENSG00000116539	hsa:501|hsa:51111|hsa:5352|hsa:55870|	501|51111|5352|55870|	http://www.genome.jp/kegg-bin/show_pathway?hsa00310/hsa:55870%09red/hsa:5352%09red/hsa:501%09red/hsa:51111%09red
Pantothenate and CoA biosynthesis	KEGG PATHWAY	hsa00770	2	18	0.180147343847	0.896739355288	ENSG00000068120|ENSG00000105552	hsa:80347|hsa:587|	80347|587|	http://www.genome.jp/kegg-bin/show_pathway?hsa00770/hsa:587%09red/hsa:80347%09red
Hippo signaling pathway	KEGG PATHWAY	hsa04390	9	154	0.181618097274	0.896739355288	ENSG00000132849|ENSG00000074211|ENSG00000106799|ENSG00000078900|ENSG00000136997|ENSG00000134982|ENSG00000081059|ENSG00000067606|ENSG00000163513	hsa:10207|hsa:5522|hsa:7046|hsa:7161|hsa:4609|hsa:324|hsa:6932|hsa:5590|hsa:7048|	10207|5522|7046|7161|4609|324|6932|5590|7048|	http://www.genome.jp/kegg-bin/show_pathway?hsa04390/hsa:5522%09red/hsa:5590%09red/hsa:7161%09red/hsa:7046%09red/hsa:10207%09red/hsa:4609%09red/hsa:6932%09red/hsa:324%09red/hsa:7048%09red
FoxO signaling pathway	KEGG PATHWAY	hsa04068	8	134	0.185631552115	0.897850568395	ENSG00000181929|ENSG00000107643|ENSG00000106617|ENSG00000106799|ENSG00000142208|ENSG00000142731|ENSG00000118689|ENSG00000163513	hsa:5571|hsa:5599|hsa:51422|hsa:7046|hsa:207|hsa:10733|hsa:2309|hsa:7048|	5571|5599|51422|7046|207|10733|2309|7048|	http://www.genome.jp/kegg-bin/show_pathway?hsa04068/hsa:51422%09red/hsa:5571%09red/hsa:5599%09red/hsa:7046%09red/hsa:10733%09red/hsa:207%09red/hsa:2309%09red/hsa:7048%09red
Platinum drug resistance	KEGG PATHWAY	hsa01524	5	75	0.197646895476	0.914270586476	ENSG00000076242|ENSG00000095002|ENSG00000142208|ENSG00000116062|ENSG00000101966	hsa:4292|hsa:4436|hsa:207|hsa:2956|hsa:331|	4292|4436|207|2956|331|	http://www.genome.jp/kegg-bin/show_pathway?hsa01524/hsa:2956%09red/hsa:4436%09red/hsa:331%09red/hsa:207%09red/hsa:4292%09red
Oxytocin signaling pathway	KEGG PATHWAY	hsa04921	9	158	0.199722080391	0.914270586476	ENSG00000181929|ENSG00000134318|ENSG00000067560|ENSG00000106617|ENSG00000004660|ENSG00000138814|ENSG00000138031|ENSG00000198668|ENSG00000148660	hsa:5571|hsa:9475|hsa:387|hsa:51422|hsa:84254|hsa:5530|hsa:109|hsa:805|hsa:818|	5571|9475|387|51422|84254|5530|109|805|818|	http://www.genome.jp/kegg-bin/show_pathway?hsa04921/hsa:805%09red/hsa:5530%09red/hsa:818%09red/hsa:9475%09red/hsa:5571%09red/hsa:51422%09red/hsa:84254%09red/hsa:109%09red/hsa:387%09red
One carbon pool by folate	KEGG PATHWAY	hsa00670	2	20	0.208582887795	0.914270586476	ENSG00000120254|ENSG00000065911	hsa:25902|hsa:10797|	25902|10797|	http://www.genome.jp/kegg-bin/show_pathway?hsa00670/hsa:25902%09red/hsa:10797%09red
Steroid biosynthesis	KEGG PATHWAY	hsa00100	2	20	0.208582887795	0.914270586476	ENSG00000116133|ENSG00000109929	hsa:1718|hsa:6309|	1718|6309|	http://www.genome.jp/kegg-bin/show_pathway?hsa00100/hsa:6309%09red/hsa:1718%09red
Toxoplasmosis	KEGG PATHWAY	hsa05145	7	119	0.216242581582	0.914270586476	ENSG00000107643|ENSG00000101966|ENSG00000130164|ENSG00000142208|ENSG00000204389|ENSG00000053747|ENSG00000109320	hsa:5599|hsa:331|hsa:3949|hsa:207|hsa:3304|hsa:3909|hsa:4790|	5599|331|3949|207|3304|3909|4790|	http://www.genome.jp/kegg-bin/show_pathway?hsa05145/hsa:3304%09red/hsa:3949%09red/hsa:4790%09red/hsa:5599%09red/hsa:331%09red/hsa:207%09red/hsa:3909%09red
Proteoglycans in cancer	KEGG PATHWAY	hsa05205	11	205	0.216896695191	0.914270586476	ENSG00000092820|ENSG00000134318|ENSG00000067560|ENSG00000137710|ENSG00000140575|ENSG00000142208|ENSG00000108443|ENSG00000136997|ENSG00000147257|ENSG00000100644|ENSG00000148660	hsa:7430|hsa:9475|hsa:387|hsa:5962|hsa:8826|hsa:207|hsa:6198|hsa:4609|hsa:2719|hsa:3091|hsa:818|	7430|9475|387|5962|8826|207|6198|4609|2719|3091|818|	http://www.genome.jp/kegg-bin/show_pathway?hsa05205/hsa:818%09red/hsa:6198%09red/hsa:8826%09red/hsa:3091%09red/hsa:5962%09red/hsa:9475%09red/hsa:7430%09red/hsa:4609%09red/hsa:2719%09red/hsa:207%09red/hsa:387%09red
Glycerolipid metabolism	KEGG PATHWAY	hsa00561	4	59	0.226653340723	0.914270586476	ENSG00000149091|ENSG00000065357|ENSG00000164904|ENSG00000117448	hsa:8525|hsa:1606|hsa:501|hsa:10327|	8525|1606|501|10327|	http://www.genome.jp/kegg-bin/show_pathway?hsa00561/hsa:8525%09red/hsa:10327%09red/hsa:1606%09red/hsa:501%09red
Regulation of autophagy	KEGG PATHWAY	hsa04140	3	40	0.231388162458	0.914270586476	ENSG00000175224|ENSG00000125703|ENSG00000152348	hsa:9776|hsa:84938|hsa:83734|	9776|84938|83734|	http://www.genome.jp/kegg-bin/show_pathway?hsa04140/hsa:83734%09red/hsa:9776%09red/hsa:84938%09red
Chemokine signaling pathway	KEGG PATHWAY	hsa04062	10	187	0.233963649485	0.914270586476	ENSG00000108691|ENSG00000134318|ENSG00000067560|ENSG00000172354|ENSG00000142208|ENSG00000198055|ENSG00000138031|ENSG00000118689|ENSG00000067606|ENSG00000109320	hsa:6347|hsa:9475|hsa:387|hsa:2783|hsa:207|hsa:2870|hsa:109|hsa:2309|hsa:5590|hsa:4790|	6347|9475|387|2783|207|2870|109|2309|5590|4790|	http://www.genome.jp/kegg-bin/show_pathway?hsa04062/hsa:2870%09red/hsa:5590%09red/hsa:2783%09red/hsa:4790%09red/hsa:6347%09red/hsa:9475%09red/hsa:109%09red/hsa:207%09red/hsa:387%09red/hsa:2309%09red
Protein processing in endoplasmic reticulum	KEGG PATHWAY	hsa04141	9	166	0.238020938846	0.914270586476	ENSG00000244038|ENSG00000107643|ENSG00000115275|ENSG00000204389|ENSG00000120694|ENSG00000134109|ENSG00000164070|ENSG00000109332|ENSG00000136986	hsa:1650|hsa:5599|hsa:7841|hsa:3304|hsa:10808|hsa:9695|hsa:22824|hsa:7323|hsa:79139|	1650|5599|7841|3304|10808|9695|22824|7323|79139|	http://www.genome.jp/kegg-bin/show_pathway?hsa04141/hsa:79139%09red/hsa:1650%09red/hsa:3304%09red/hsa:5599%09red/hsa:7323%09red/hsa:10808%09red/hsa:22824%09red/hsa:9695%09red/hsa:7841%09red
Oocyte meiosis	KEGG PATHWAY	hsa04114	7	123	0.239025454498	0.914270586476	ENSG00000112029|ENSG00000148660|ENSG00000065613|ENSG00000138031|ENSG00000137449|ENSG00000198668|ENSG00000138814	hsa:26271|hsa:818|hsa:9748|hsa:109|hsa:132864|hsa:805|hsa:5530|	26271|818|9748|109|132864|805|5530|	http://www.genome.jp/kegg-bin/show_pathway?hsa04114/hsa:805%09red/hsa:5530%09red/hsa:818%09red/hsa:132864%09red/hsa:9748%09red/hsa:26271%09red/hsa:109%09red
Aldosterone synthesis and secretion	KEGG PATHWAY	hsa04925	5	81	0.239777651576	0.914270586476	ENSG00000115825|ENSG00000130164|ENSG00000198668|ENSG00000148660|ENSG00000138031	hsa:23683|hsa:3949|hsa:805|hsa:818|hsa:109|	23683|3949|805|818|109|	http://www.genome.jp/kegg-bin/show_pathway?hsa04925/hsa:23683%09red/hsa:3949%09red/hsa:805%09red/hsa:818%09red/hsa:109%09red
Rap1 signaling pathway	KEGG PATHWAY	hsa04015	11	211	0.242819118976	0.914270586476	ENSG00000115825|ENSG00000138031|ENSG00000067560|ENSG00000160271|ENSG00000142208|ENSG00000160867|ENSG00000116991|ENSG00000066468|ENSG00000076864|ENSG00000198668|ENSG00000067606	hsa:23683|hsa:109|hsa:387|hsa:5900|hsa:207|hsa:2264|hsa:57568|hsa:2263|hsa:5909|hsa:805|hsa:5590|	23683|109|387|5900|207|2264|57568|2263|5909|805|5590|	http://www.genome.jp/kegg-bin/show_pathway?hsa04015/hsa:5900%09red/hsa:805%09red/hsa:5590%09red/hsa:23683%09red/hsa:2263%09red/hsa:2264%09red/hsa:5909%09red/hsa:57568%09red/hsa:109%09red/hsa:207%09red/hsa:387%09red
Cell cycle	KEGG PATHWAY	hsa04110	7	124	0.244839542679	0.914270586476	ENSG00000114126|ENSG00000253729|ENSG00000112118|ENSG00000136997|ENSG00000183765|ENSG00000002822|ENSG00000196591	hsa:7029|hsa:5591|hsa:4172|hsa:4609|hsa:11200|hsa:8379|hsa:3066|	7029|5591|4172|4609|11200|8379|3066|	http://www.genome.jp/kegg-bin/show_pathway?hsa04110/hsa:4172%09red/hsa:5591%09red/hsa:11200%09red/hsa:3066%09red/hsa:7029%09red/hsa:4609%09red/hsa:8379%09red
HIF-1 signaling pathway	KEGG PATHWAY	hsa04066	6	103	0.246891635166	0.914270586476	ENSG00000108094|ENSG00000142208|ENSG00000108443|ENSG00000100644|ENSG00000148660|ENSG00000109320	hsa:8453|hsa:207|hsa:6198|hsa:3091|hsa:818|hsa:4790|	8453|207|6198|3091|818|4790|	http://www.genome.jp/kegg-bin/show_pathway?hsa04066/hsa:818%09red/hsa:6198%09red/hsa:4790%09red/hsa:207%09red/hsa:3091%09red/hsa:8453%09red
Glycosaminoglycan biosynthesis - heparan sulfate / heparin	KEGG PATHWAY	hsa00534	2	24	0.266456661012	0.945194381971	ENSG00000070614|ENSG00000015532	hsa:3340|hsa:64132|	3340|64132|	http://www.genome.jp/kegg-bin/show_pathway?hsa00534/hsa:3340%09red/hsa:64132%09red
RNA transport	KEGG PATHWAY	hsa03013	9	172	0.268313542156	0.945194381971	ENSG00000110713|ENSG00000100813|ENSG00000105171|ENSG00000092208|ENSG00000075151|ENSG00000102081|ENSG00000179409|ENSG00000101146|ENSG00000115211	hsa:4928|hsa:22985|hsa:10775|hsa:8487|hsa:8672|hsa:2332|hsa:50628|hsa:8480|hsa:8890|	4928|22985|10775|8487|8672|2332|50628|8480|8890|	http://www.genome.jp/kegg-bin/show_pathway?hsa03013/hsa:8480%09red/hsa:2332%09red/hsa:10775%09red/hsa:8487%09red/hsa:4928%09red/hsa:50628%09red/hsa:22985%09red/hsa:8672%09red/hsa:8890%09red
Cytosolic DNA-sensing pathway	KEGG PATHWAY	hsa04623	4	64	0.269049340842	0.945194381971	ENSG00000058600|ENSG00000185507|ENSG00000137275|ENSG00000109320	hsa:55718|hsa:3665|hsa:8737|hsa:4790|	55718|3665|8737|4790|	http://www.genome.jp/kegg-bin/show_pathway?hsa04623/hsa:55718%09red/hsa:3665%09red/hsa:8737%09red/hsa:4790%09red
Proteasome	KEGG PATHWAY	hsa03050	3	44	0.273310229618	0.945194381971	ENSG00000175166|ENSG00000173692|ENSG00000131467	hsa:5708|hsa:5707|hsa:10197|	5708|5707|10197|	http://www.genome.jp/kegg-bin/show_pathway?hsa03050/hsa:5707%09red/hsa:5708%09red/hsa:10197%09red
Dopaminergic synapse	KEGG PATHWAY	hsa04728	7	130	0.280578514451	0.945194381971	ENSG00000074211|ENSG00000107643|ENSG00000172354|ENSG00000142208|ENSG00000148660|ENSG00000198668|ENSG00000138814	hsa:5522|hsa:5599|hsa:2783|hsa:207|hsa:818|hsa:805|hsa:5530|	5522|5599|2783|207|818|805|5530|	http://www.genome.jp/kegg-bin/show_pathway?hsa04728/hsa:5522%09red/hsa:805%09red/hsa:5530%09red/hsa:818%09red/hsa:2783%09red/hsa:5599%09red/hsa:207%09red
Basal transcription factors	KEGG PATHWAY	hsa03022	3	45	0.283923884435	0.945194381971	ENSG00000141384|ENSG00000273841|ENSG00000147133	hsa:6875|hsa:6880|hsa:6872|	6875|6880|6872|	http://www.genome.jp/kegg-bin/show_pathway?hsa03022/hsa:6875%09red/hsa:6880%09red/hsa:6872%09red
Influenza A	KEGG PATHWAY	hsa05164	9	176	0.289122505078	0.945194381971	ENSG00000108691|ENSG00000185507|ENSG00000107643|ENSG00000110713|ENSG00000142208|ENSG00000204389|ENSG00000160703|ENSG00000101146|ENSG00000109320	hsa:6347|hsa:3665|hsa:5599|hsa:4928|hsa:207|hsa:3304|hsa:79671|hsa:8480|hsa:4790|	6347|3665|5599|4928|207|3304|79671|8480|4790|	http://www.genome.jp/kegg-bin/show_pathway?hsa05164/hsa:3665%09red/hsa:3304%09red/hsa:4790%09red/hsa:6347%09red/hsa:5599%09red/hsa:8480%09red/hsa:207%09red/hsa:79671%09red/hsa:4928%09red
cAMP signaling pathway	KEGG PATHWAY	hsa04024	10	199	0.291465973951	0.945194381971	ENSG00000107643|ENSG00000067560|ENSG00000142208|ENSG00000070961|ENSG00000186951|ENSG00000138031|ENSG00000134318|ENSG00000198668|ENSG00000148660|ENSG00000109320	hsa:5599|hsa:387|hsa:207|hsa:490|hsa:5465|hsa:109|hsa:9475|hsa:805|hsa:818|hsa:4790|	5599|387|207|490|5465|109|9475|805|818|4790|	http://www.genome.jp/kegg-bin/show_pathway?hsa04024/hsa:805%09red/hsa:818%09red/hsa:4790%09red/hsa:9475%09red/hsa:490%09red/hsa:5599%09red/hsa:5465%09red/hsa:109%09red/hsa:207%09red/hsa:387%09red
Osteoclast differentiation	KEGG PATHWAY	hsa04380	7	132	0.292772673271	0.945194381971	ENSG00000107643|ENSG00000083799|ENSG00000106799|ENSG00000142208|ENSG00000163513|ENSG00000138814|ENSG00000109320	hsa:5599|hsa:1540|hsa:7046|hsa:207|hsa:7048|hsa:5530|hsa:4790|	5599|1540|7046|207|7048|5530|4790|	http://www.genome.jp/kegg-bin/show_pathway?hsa04380/hsa:5530%09red/hsa:207%09red/hsa:4790%09red/hsa:7046%09red/hsa:5599%09red/hsa:1540%09red/hsa:7048%09red
Central carbon metabolism in cancer	KEGG PATHWAY	hsa05230	4	67	0.295123984244	0.945194381971	ENSG00000066468|ENSG00000136997|ENSG00000100644|ENSG00000142208	hsa:2263|hsa:4609|hsa:3091|hsa:207|	2263|4609|3091|207|	http://www.genome.jp/kegg-bin/show_pathway?hsa05230/hsa:4609%09red/hsa:207%09red/hsa:3091%09red/hsa:2263%09red
Valine, leucine and isoleucine degradation	KEGG PATHWAY	hsa00280	3	48	0.315928004061	0.946767478363	ENSG00000164904|ENSG00000176715|ENSG00000105552	hsa:501|hsa:197322|hsa:587|	501|197322|587|	http://www.genome.jp/kegg-bin/show_pathway?hsa00280/hsa:587%09red/hsa:197322%09red/hsa:501%09red
Amino sugar and nucleotide sugar metabolism	KEGG PATHWAY	hsa00520	3	48	0.315928004061	0.946767478363	ENSG00000100243|ENSG00000159921|ENSG00000112699	hsa:1727|hsa:10020|hsa:2762|	1727|10020|2762|	http://www.genome.jp/kegg-bin/show_pathway?hsa00520/hsa:1727%09red/hsa:10020%09red/hsa:2762%09red
NF-kappa B signaling pathway	KEGG PATHWAY	hsa04064	5	93	0.32968545946	0.946767478363	ENSG00000101966|ENSG00000109320|ENSG00000131323|ENSG00000082805|ENSG00000137275	hsa:331|hsa:4790|hsa:7187|hsa:23085|hsa:8737|	331|4790|7187|23085|8737|	http://www.genome.jp/kegg-bin/show_pathway?hsa04064/hsa:23085%09red/hsa:331%09red/hsa:8737%09red/hsa:7187%09red/hsa:4790%09red
Prolactin signaling pathway	KEGG PATHWAY	hsa04917	4	72	0.33917119478	0.946767478363	ENSG00000109320|ENSG00000118689|ENSG00000107643|ENSG00000142208	hsa:4790|hsa:2309|hsa:5599|hsa:207|	4790|2309|5599|207|	http://www.genome.jp/kegg-bin/show_pathway?hsa04917/hsa:4790%09red/hsa:207%09red/hsa:2309%09red/hsa:5599%09red
Glycerophospholipid metabolism	KEGG PATHWAY	hsa00564	5	95	0.345072650117	0.946767478363	ENSG00000149091|ENSG00000011009|ENSG00000032444|ENSG00000105223|ENSG00000065357	hsa:8525|hsa:11313|hsa:10908|hsa:23646|hsa:1606|	8525|11313|10908|23646|1606|	http://www.genome.jp/kegg-bin/show_pathway?hsa00564/hsa:8525%09red/hsa:23646%09red/hsa:1606%09red/hsa:11313%09red/hsa:10908%09red
Vibrio cholerae infection	KEGG PATHWAY	hsa05110	3	51	0.347990114061	0.946767478363	ENSG00000064651|ENSG00000104067|ENSG00000138031	hsa:6558|hsa:7082|hsa:109|	6558|7082|109|	http://www.genome.jp/kegg-bin/show_pathway?hsa05110/hsa:109%09red/hsa:6558%09red/hsa:7082%09red
Sulfur metabolism	KEGG PATHWAY	hsa00920	1	10	0.352198560475	0.946767478363	ENSG00000139531	hsa:6821|	6821|	http://www.genome.jp/kegg-bin/show_pathway?hsa00920/hsa:6821%09red
Gastric acid secretion	KEGG PATHWAY	hsa04971	4	74	0.356877591599	0.946767478363	ENSG00000092820|ENSG00000198668|ENSG00000148660|ENSG00000138031	hsa:7430|hsa:805|hsa:818|hsa:109|	7430|805|818|109|	http://www.genome.jp/kegg-bin/show_pathway?hsa04971/hsa:109%09red/hsa:7430%09red/hsa:805%09red/hsa:818%09red
HTLV-I infection	KEGG PATHWAY	hsa05166	12	259	0.358075619252	0.946767478363	ENSG00000105662|ENSG00000107643|ENSG00000101966|ENSG00000106799|ENSG00000142208|ENSG00000136997|ENSG00000183765|ENSG00000134982|ENSG00000138031|ENSG00000163513|ENSG00000138814|ENSG00000109320	hsa:23373|hsa:5599|hsa:331|hsa:7046|hsa:207|hsa:4609|hsa:11200|hsa:324|hsa:109|hsa:7048|hsa:5530|hsa:4790|	23373|5599|331|7046|207|4609|11200|324|109|7048|5530|4790|	http://www.genome.jp/kegg-bin/show_pathway?hsa05166/hsa:5530%09red/hsa:324%09red/hsa:5599%09red/hsa:11200%09red/hsa:4790%09red/hsa:7046%09red/hsa:23373%09red/hsa:4609%09red/hsa:109%09red/hsa:331%09red/hsa:207%09red/hsa:7048%09red
Pertussis	KEGG PATHWAY	hsa05133	4	75	0.365730388741	0.946767478363	ENSG00000198668|ENSG00000107643|ENSG00000067560|ENSG00000109320	hsa:805|hsa:5599|hsa:387|hsa:4790|	805|5599|387|4790|	http://www.genome.jp/kegg-bin/show_pathway?hsa05133/hsa:4790%09red/hsa:805%09red/hsa:387%09red/hsa:5599%09red
Other types of O-glycan biosynthesis	KEGG PATHWAY	hsa00514	2	31	0.36695308607	0.946767478363	ENSG00000130714|ENSG00000169733	hsa:10585|hsa:5986|	10585|5986|	http://www.genome.jp/kegg-bin/show_pathway?hsa00514/hsa:5986%09red/hsa:10585%09red
Circadian rhythm	KEGG PATHWAY	hsa04710	2	31	0.36695308607	0.946767478363	ENSG00000106617|ENSG00000181929	hsa:51422|hsa:5571|	51422|5571|	http://www.genome.jp/kegg-bin/show_pathway?hsa04710/hsa:5571%09red/hsa:51422%09red
Inflammatory mediator regulation of TRP channels	KEGG PATHWAY	hsa04750	5	98	0.368226712255	0.946767478363	ENSG00000107643|ENSG00000198668|ENSG00000148660|ENSG00000138031|ENSG00000196689	hsa:5599|hsa:805|hsa:818|hsa:109|hsa:7442|	5599|805|818|109|7442|	http://www.genome.jp/kegg-bin/show_pathway?hsa04750/hsa:109%09red/hsa:805%09red/hsa:5599%09red/hsa:818%09red/hsa:7442%09red
Progesterone-mediated oocyte maturation	KEGG PATHWAY	hsa04914	5	98	0.368226712255	0.946767478363	ENSG00000002822|ENSG00000137449|ENSG00000107643|ENSG00000138031|ENSG00000142208	hsa:8379|hsa:132864|hsa:5599|hsa:109|hsa:207|	8379|132864|5599|109|207|	http://www.genome.jp/kegg-bin/show_pathway?hsa04914/hsa:207%09red/hsa:109%09red/hsa:132864%09red/hsa:8379%09red/hsa:5599%09red
Platelet activation	KEGG PATHWAY	hsa04611	6	122	0.375541472915	0.946767478363	ENSG00000160007|ENSG00000138031|ENSG00000067560|ENSG00000142208|ENSG00000134318|ENSG00000067606	hsa:2909|hsa:109|hsa:387|hsa:207|hsa:9475|hsa:5590|	2909|109|387|207|9475|5590|	http://www.genome.jp/kegg-bin/show_pathway?hsa04611/hsa:5590%09red/hsa:9475%09red/hsa:2909%09red/hsa:109%09red/hsa:207%09red/hsa:387%09red
Base excision repair	KEGG PATHWAY	hsa03410	2	33	0.394791112656	0.946767478363	ENSG00000154328|ENSG00000166169	hsa:252969|hsa:27343|	252969|27343|	http://www.genome.jp/kegg-bin/show_pathway?hsa03410/hsa:252969%09red/hsa:27343%09red
Apoptosis - multiple species	KEGG PATHWAY	hsa04215	2	33	0.394791112656	0.946767478363	ENSG00000107643|ENSG00000101966	hsa:5599|hsa:331|	5599|331|	http://www.genome.jp/kegg-bin/show_pathway?hsa04215/hsa:331%09red/hsa:5599%09red
Non-small cell lung cancer	KEGG PATHWAY	hsa05223	3	56	0.400975468365	0.946767478363	ENSG00000118689|ENSG00000142208|ENSG00000143924	hsa:2309|hsa:207|hsa:27436|	2309|207|27436|	http://www.genome.jp/kegg-bin/show_pathway?hsa05223/hsa:27436%09red/hsa:207%09red/hsa:2309%09red
NOD-like receptor signaling pathway	KEGG PATHWAY	hsa04621	3	57	0.411442314602	0.946767478363	ENSG00000108691|ENSG00000107643|ENSG00000109320	hsa:6347|hsa:5599|hsa:4790|	6347|5599|4790|	http://www.genome.jp/kegg-bin/show_pathway?hsa04621/hsa:6347%09red/hsa:4790%09red/hsa:5599%09red
EGFR tyrosine kinase inhibitor resistance	KEGG PATHWAY	hsa01521	4	81	0.41856643894	0.946767478363	ENSG00000066468|ENSG00000118689|ENSG00000142208|ENSG00000108443	hsa:2263|hsa:2309|hsa:207|hsa:6198|	2263|2309|207|6198|	http://www.genome.jp/kegg-bin/show_pathway?hsa01521/hsa:207%09red/hsa:2309%09red/hsa:6198%09red/hsa:2263%09red
Prion diseases	KEGG PATHWAY	hsa05020	2	35	0.422054139228	0.946767478363	ENSG00000171867|ENSG00000154654	hsa:5621|hsa:4685|	5621|4685|	http://www.genome.jp/kegg-bin/show_pathway?hsa05020/hsa:5621%09red/hsa:4685%09red
T cell receptor signaling pathway	KEGG PATHWAY	hsa04660	5	105	0.422167505827	0.946767478363	ENSG00000158092|ENSG00000138814|ENSG00000142208|ENSG00000067560|ENSG00000109320	hsa:4690|hsa:5530|hsa:207|hsa:387|hsa:4790|	4690|5530|207|387|4790|	http://www.genome.jp/kegg-bin/show_pathway?hsa04660/hsa:4690%09red/hsa:207%09red/hsa:387%09red/hsa:4790%09red/hsa:5530%09red
Fatty acid biosynthesis	KEGG PATHWAY	hsa00061	1	13	0.424555627052	0.946767478363	ENSG00000278540	hsa:31|	31|	http://www.genome.jp/kegg-bin/show_pathway?hsa00061/hsa:31%09red
Folate biosynthesis	KEGG PATHWAY	hsa00790	1	14	0.446833511354	0.946767478363	ENSG00000151552	hsa:5860|	5860|	http://www.genome.jp/kegg-bin/show_pathway?hsa00790/hsa:5860%09red
Viral carcinogenesis	KEGG PATHWAY	hsa05203	9	205	0.447444746689	0.946767478363	ENSG00000131323|ENSG00000185507|ENSG00000067560|ENSG00000002822|ENSG00000196591|ENSG00000168214|ENSG00000067066|ENSG00000270882|ENSG00000109320	hsa:7187|hsa:3665|hsa:387|hsa:8379|hsa:3066|hsa:3516|hsa:6672|hsa:554313|hsa:4790|	7187|3665|387|8379|3066|3516|6672|554313|4790|	http://www.genome.jp/kegg-bin/show_pathway?hsa05203/hsa:8379%09red/hsa:3665%09red/hsa:4790%09red/hsa:7187%09red/hsa:387%09red/hsa:3066%09red/hsa:554313%09red/hsa:3516%09red/hsa:6672%09red
VEGF signaling pathway	KEGG PATHWAY	hsa04370	3	61	0.45267799964	0.946767478363	ENSG00000142208|ENSG00000114738|ENSG00000138814	hsa:207|hsa:7867|hsa:5530|	207|7867|5530|	http://www.genome.jp/kegg-bin/show_pathway?hsa04370/hsa:7867%09red/hsa:207%09red/hsa:5530%09red
Glycosaminoglycan biosynthesis - keratan sulfate	KEGG PATHWAY	hsa00533	1	15	0.468249719508	0.946767478363	ENSG00000121578	hsa:8702|	8702|	http://www.genome.jp/kegg-bin/show_pathway?hsa00533/hsa:8702%09red
Herpes simplex infection	KEGG PATHWAY	hsa05168	8	186	0.478048918939	0.946767478363	ENSG00000108691|ENSG00000131323|ENSG00000185507|ENSG00000107643|ENSG00000141384|ENSG00000067066|ENSG00000109320|ENSG00000204209	hsa:6347|hsa:7187|hsa:3665|hsa:5599|hsa:6875|hsa:6672|hsa:4790|hsa:1616|	6347|7187|3665|5599|6875|6672|4790|1616|	http://www.genome.jp/kegg-bin/show_pathway?hsa05168/hsa:3665%09red/hsa:1616%09red/hsa:6875%09red/hsa:4790%09red/hsa:6672%09red/hsa:6347%09red/hsa:5599%09red/hsa:7187%09red
Renin secretion	KEGG PATHWAY	hsa04924	3	64	0.482802448144	0.946767478363	ENSG00000198668|ENSG00000138814|ENSG00000164733	hsa:805|hsa:5530|hsa:1508|	805|5530|1508|	http://www.genome.jp/kegg-bin/show_pathway?hsa04924/hsa:1508%09red/hsa:805%09red/hsa:5530%09red
Prostate cancer	KEGG PATHWAY	hsa05215	4	89	0.487194432969	0.946767478363	ENSG00000066468|ENSG00000109320|ENSG00000142208|ENSG00000081059	hsa:2263|hsa:4790|hsa:207|hsa:6932|	2263|4790|207|6932|	http://www.genome.jp/kegg-bin/show_pathway?hsa05215/hsa:6932%09red/hsa:207%09red/hsa:4790%09red/hsa:2263%09red
Salivary secretion	KEGG PATHWAY	hsa04970	4	89	0.487194432969	0.946767478363	ENSG00000064651|ENSG00000070961|ENSG00000198668|ENSG00000138031	hsa:6558|hsa:490|hsa:805|hsa:109|	6558|490|805|109|	http://www.genome.jp/kegg-bin/show_pathway?hsa04970/hsa:109%09red/hsa:490%09red/hsa:805%09red/hsa:6558%09red
Pyruvate metabolism	KEGG PATHWAY	hsa00620	2	40	0.487251485015	0.946767478363	ENSG00000164904|ENSG00000278540	hsa:501|hsa:31|	501|31|	http://www.genome.jp/kegg-bin/show_pathway?hsa00620/hsa:31%09red/hsa:501%09red
Glycine, serine and threonine metabolism	KEGG PATHWAY	hsa00260	2	40	0.487251485015	0.946767478363	ENSG00000164904|ENSG00000158578	hsa:501|hsa:212|	501|212|	http://www.genome.jp/kegg-bin/show_pathway?hsa00260/hsa:212%09red/hsa:501%09red
Tryptophan metabolism	KEGG PATHWAY	hsa00380	2	40	0.487251485015	0.946767478363	ENSG00000140465|ENSG00000164904	hsa:1543|hsa:501|	1543|501|	http://www.genome.jp/kegg-bin/show_pathway?hsa00380/hsa:501%09red/hsa:1543%09red
Shigellosis	KEGG PATHWAY	hsa05131	3	65	0.492667976173	0.946767478363	ENSG00000107643|ENSG00000134318|ENSG00000109320	hsa:5599|hsa:9475|hsa:4790|	5599|9475|4790|	http://www.genome.jp/kegg-bin/show_pathway?hsa05131/hsa:9475%09red/hsa:4790%09red/hsa:5599%09red
Glioma	KEGG PATHWAY	hsa05214	3	65	0.492667976173	0.946767478363	ENSG00000198668|ENSG00000148660|ENSG00000142208	hsa:805|hsa:818|hsa:207|	805|818|207|	http://www.genome.jp/kegg-bin/show_pathway?hsa05214/hsa:805%09red/hsa:207%09red/hsa:818%09red
Regulation of actin cytoskeleton	KEGG PATHWAY	hsa04810	9	215	0.501955030462	0.946767478363	ENSG00000092820|ENSG00000160007|ENSG00000134318|ENSG00000067560|ENSG00000137710|ENSG00000140575|ENSG00000134982|ENSG00000160867|ENSG00000066468	hsa:7430|hsa:2909|hsa:9475|hsa:387|hsa:5962|hsa:8826|hsa:324|hsa:2264|hsa:2263|	7430|2909|9475|387|5962|8826|324|2264|2263|	http://www.genome.jp/kegg-bin/show_pathway?hsa04810/hsa:5962%09red/hsa:8826%09red/hsa:2264%09red/hsa:9475%09red/hsa:7430%09red/hsa:2909%09red/hsa:2263%09red/hsa:324%09red/hsa:387%09red
Aminoacyl-tRNA biosynthesis	KEGG PATHWAY	hsa00970	3	66	0.50243929328	0.946767478363	ENSG00000059691|ENSG00000137411|ENSG00000133706	hsa:5188|hsa:57176|hsa:51520|	5188|57176|51520|	http://www.genome.jp/kegg-bin/show_pathway?hsa00970/hsa:5188%09red/hsa:57176%09red/hsa:51520%09red
Long-term potentiation	KEGG PATHWAY	hsa04720	3	66	0.50243929328	0.946767478363	ENSG00000198668|ENSG00000148660|ENSG00000138814	hsa:805|hsa:818|hsa:5530|	805|818|5530|	http://www.genome.jp/kegg-bin/show_pathway?hsa04720/hsa:805%09red/hsa:5530%09red/hsa:818%09red
Morphine addiction	KEGG PATHWAY	hsa05032	4	91	0.503851442832	0.946767478363	ENSG00000172354|ENSG00000073417|ENSG00000138031|ENSG00000198055	hsa:2783|hsa:5151|hsa:109|hsa:2870|	2783|5151|109|2870|	http://www.genome.jp/kegg-bin/show_pathway?hsa05032/hsa:2783%09red/hsa:2870%09red/hsa:5151%09red/hsa:109%09red
GnRH signaling pathway	KEGG PATHWAY	hsa04912	4	91	0.503851442832	0.946767478363	ENSG00000198668|ENSG00000148660|ENSG00000138031|ENSG00000107643	hsa:805|hsa:818|hsa:109|hsa:5599|	805|818|109|5599|	http://www.genome.jp/kegg-bin/show_pathway?hsa04912/hsa:109%09red/hsa:805%09red/hsa:5599%09red/hsa:818%09red
Porphyrin and chlorophyll metabolism	KEGG PATHWAY	hsa00860	2	42	0.512016644576	0.946767478363	ENSG00000165060|ENSG00000158578	hsa:2395|hsa:212|	2395|212|	http://www.genome.jp/kegg-bin/show_pathway?hsa00860/hsa:2395%09red/hsa:212%09red
mRNA surveillance pathway	KEGG PATHWAY	hsa03015	4	92	0.512089869588	0.946767478363	ENSG00000100813|ENSG00000153944|ENSG00000111605|ENSG00000074211	hsa:22985|hsa:124540|hsa:11052|hsa:5522|	22985|124540|11052|5522|	http://www.genome.jp/kegg-bin/show_pathway?hsa03015/hsa:11052%09red/hsa:5522%09red/hsa:124540%09red/hsa:22985%09red
Amphetamine addiction	KEGG PATHWAY	hsa05031	3	67	0.51211303619	0.946767478363	ENSG00000198668|ENSG00000148660|ENSG00000138814	hsa:805|hsa:818|hsa:5530|	805|818|5530|	http://www.genome.jp/kegg-bin/show_pathway?hsa05031/hsa:805%09red/hsa:5530%09red/hsa:818%09red
Renal cell carcinoma	KEGG PATHWAY	hsa05211	3	67	0.51211303619	0.946767478363	ENSG00000100644|ENSG00000142208|ENSG00000108094	hsa:3091|hsa:207|hsa:8453|	3091|207|8453|	http://www.genome.jp/kegg-bin/show_pathway?hsa05211/hsa:207%09red/hsa:3091%09red/hsa:8453%09red
Signaling pathways regulating pluripotency of stem cells	KEGG PATHWAY	hsa04550	6	142	0.512214791446	0.946767478363	ENSG00000136997|ENSG00000142208|ENSG00000134982|ENSG00000160867|ENSG00000066468|ENSG00000130829	hsa:4609|hsa:207|hsa:324|hsa:2264|hsa:2263|hsa:1852|	4609|207|324|2264|2263|1852|	http://www.genome.jp/kegg-bin/show_pathway?hsa04550/hsa:207%09red/hsa:2264%09red/hsa:1852%09red/hsa:2263%09red/hsa:4609%09red/hsa:324%09red
cGMP-PKG signaling pathway	KEGG PATHWAY	hsa04022	7	167	0.512346437374	0.946767478363	ENSG00000134318|ENSG00000067560|ENSG00000142208|ENSG00000070961|ENSG00000138031|ENSG00000198668|ENSG00000138814	hsa:9475|hsa:387|hsa:207|hsa:490|hsa:109|hsa:805|hsa:5530|	9475|387|207|490|109|805|5530|	http://www.genome.jp/kegg-bin/show_pathway?hsa04022/hsa:805%09red/hsa:5530%09red/hsa:9475%09red/hsa:490%09red/hsa:109%09red/hsa:207%09red/hsa:387%09red
Thyroid hormone signaling pathway	KEGG PATHWAY	hsa04919	5	118	0.519378283104	0.946767478363	ENSG00000136997|ENSG00000142208|ENSG00000100644|ENSG00000196591|ENSG00000084676	hsa:4609|hsa:207|hsa:3091|hsa:3066|hsa:8648|	4609|207|3091|3066|8648|	http://www.genome.jp/kegg-bin/show_pathway?hsa04919/hsa:8648%09red/hsa:4609%09red/hsa:207%09red/hsa:3091%09red/hsa:3066%09red
Leukocyte transendothelial migration	KEGG PATHWAY	hsa04670	5	118	0.519378283104	0.946767478363	ENSG00000160007|ENSG00000092820|ENSG00000100852|ENSG00000134318|ENSG00000067560	hsa:2909|hsa:7430|hsa:394|hsa:9475|hsa:387|	2909|7430|394|9475|387|	http://www.genome.jp/kegg-bin/show_pathway?hsa04670/hsa:394%09red/hsa:7430%09red/hsa:2909%09red/hsa:387%09red/hsa:9475%09red
Epithelial cell signaling in Helicobacter pylori infection	KEGG PATHWAY	hsa05120	3	68	0.521686082599	0.946767478363	ENSG00000104067|ENSG00000107643|ENSG00000109320	hsa:7082|hsa:5599|hsa:4790|	7082|5599|4790|	http://www.genome.jp/kegg-bin/show_pathway?hsa05120/hsa:7082%09red/hsa:4790%09red/hsa:5599%09red
Phospholipase D signaling pathway	KEGG PATHWAY	hsa04072	6	144	0.52535718391	0.946767478363	ENSG00000067560|ENSG00000160271|ENSG00000142208|ENSG00000065357|ENSG00000138031|ENSG00000149091	hsa:387|hsa:5900|hsa:207|hsa:1606|hsa:109|hsa:8525|	387|5900|207|1606|109|8525|	http://www.genome.jp/kegg-bin/show_pathway?hsa04072/hsa:5900%09red/hsa:1606%09red/hsa:8525%09red/hsa:109%09red/hsa:207%09red/hsa:387%09red
Other glycan degradation	KEGG PATHWAY	hsa00511	1	18	0.527654885331	0.946767478363	ENSG00000177628	hsa:2629|	2629|	http://www.genome.jp/kegg-bin/show_pathway?hsa00511/hsa:2629%09red
2-Oxocarboxylic acid metabolism	KEGG PATHWAY	hsa01210	1	18	0.527654885331	0.946767478363	ENSG00000105552	hsa:587|	587|	http://www.genome.jp/kegg-bin/show_pathway?hsa01210/hsa:587%09red
p53 signaling pathway	KEGG PATHWAY	hsa04115	3	69	0.531155543778	0.946767478363	ENSG00000183765|ENSG00000078900|ENSG00000115107	hsa:11200|hsa:7161|hsa:55240|	11200|7161|55240|	http://www.genome.jp/kegg-bin/show_pathway?hsa04115/hsa:7161%09red/hsa:55240%09red/hsa:11200%09red
Circadian entrainment	KEGG PATHWAY	hsa04713	4	95	0.536417075639	0.946767478363	ENSG00000172354|ENSG00000198668|ENSG00000148660|ENSG00000138031	hsa:2783|hsa:805|hsa:818|hsa:109|	2783|805|818|109|	http://www.genome.jp/kegg-bin/show_pathway?hsa04713/hsa:2783%09red/hsa:109%09red/hsa:805%09red/hsa:818%09red
Hepatitis B	KEGG PATHWAY	hsa05161	6	146	0.538354440784	0.946767478363	ENSG00000185507|ENSG00000107643|ENSG00000106799|ENSG00000142208|ENSG00000136997|ENSG00000109320	hsa:3665|hsa:5599|hsa:7046|hsa:207|hsa:4609|hsa:4790|	3665|5599|7046|207|4609|4790|	http://www.genome.jp/kegg-bin/show_pathway?hsa05161/hsa:3665%09red/hsa:4790%09red/hsa:7046%09red/hsa:5599%09red/hsa:4609%09red/hsa:207%09red
Pancreatic secretion	KEGG PATHWAY	hsa04972	4	96	0.544389760036	0.946767478363	ENSG00000070961|ENSG00000064651|ENSG00000138031|ENSG00000067560	hsa:490|hsa:6558|hsa:109|hsa:387|	490|6558|109|387|	http://www.genome.jp/kegg-bin/show_pathway?hsa04972/hsa:109%09red/hsa:490%09red/hsa:387%09red/hsa:6558%09red
Ether lipid metabolism	KEGG PATHWAY	hsa00565	2	45	0.547654344712	0.946767478363	ENSG00000105223|ENSG00000158006	hsa:23646|hsa:5051|	23646|5051|	http://www.genome.jp/kegg-bin/show_pathway?hsa00565/hsa:23646%09red/hsa:5051%09red
Inositol phosphate metabolism	KEGG PATHWAY	hsa00562	3	71	0.549773278812	0.946767478363	ENSG00000087053|ENSG00000078269|ENSG00000100605	hsa:8898|hsa:8871|hsa:3705|	8898|8871|3705|	http://www.genome.jp/kegg-bin/show_pathway?hsa00562/hsa:8871%09red/hsa:3705%09red/hsa:8898%09red
Endocrine resistance	KEGG PATHWAY	hsa01522	4	97	0.55229102515	0.946767478363	ENSG00000142208|ENSG00000138031|ENSG00000108443|ENSG00000107643	hsa:207|hsa:109|hsa:6198|hsa:5599|	207|109|6198|5599|	http://www.genome.jp/kegg-bin/show_pathway?hsa01522/hsa:109%09red/hsa:207%09red/hsa:5599%09red/hsa:6198%09red
Lysosome	KEGG PATHWAY	hsa04142	5	123	0.554923379373	0.946767478363	ENSG00000171298|ENSG00000134243|ENSG00000129354|ENSG00000164733|ENSG00000177628	hsa:2548|hsa:6272|hsa:10053|hsa:1508|hsa:2629|	2548|6272|10053|1508|2629|	http://www.genome.jp/kegg-bin/show_pathway?hsa04142/hsa:1508%09red/hsa:6272%09red/hsa:10053%09red/hsa:2548%09red/hsa:2629%09red
Adrenergic signaling in cardiomyocytes	KEGG PATHWAY	hsa04261	6	149	0.557556229187	0.946767478363	ENSG00000074211|ENSG00000142208|ENSG00000070961|ENSG00000138031|ENSG00000198668|ENSG00000148660	hsa:5522|hsa:207|hsa:490|hsa:109|hsa:805|hsa:818|	5522|207|490|109|805|818|	http://www.genome.jp/kegg-bin/show_pathway?hsa04261/hsa:5522%09red/hsa:805%09red/hsa:818%09red/hsa:490%09red/hsa:109%09red/hsa:207%09red
Axon guidance	KEGG PATHWAY	hsa04360	7	176	0.5659724155	0.946767478363	ENSG00000164050|ENSG00000074527|ENSG00000067560|ENSG00000158092|ENSG00000138814|ENSG00000134318|ENSG00000148660	hsa:5364|hsa:59277|hsa:387|hsa:4690|hsa:5530|hsa:9475|hsa:818|	5364|59277|387|4690|5530|9475|818|	http://www.genome.jp/kegg-bin/show_pathway?hsa04360/hsa:59277%09red/hsa:818%09red/hsa:4690%09red/hsa:5364%09red/hsa:9475%09red/hsa:387%09red/hsa:5530%09red
Estrogen signaling pathway	KEGG PATHWAY	hsa04915	4	99	0.5678723298	0.946767478363	ENSG00000198668|ENSG00000142208|ENSG00000138031|ENSG00000204389	hsa:805|hsa:207|hsa:109|hsa:3304|	805|207|109|3304|	http://www.genome.jp/kegg-bin/show_pathway?hsa04915/hsa:3304%09red/hsa:109%09red/hsa:207%09red/hsa:805%09red
B cell receptor signaling pathway	KEGG PATHWAY	hsa04662	3	73	0.567947520648	0.946767478363	ENSG00000138814|ENSG00000142208|ENSG00000109320	hsa:5530|hsa:207|hsa:4790|	5530|207|4790|	http://www.genome.jp/kegg-bin/show_pathway?hsa04662/hsa:207%09red/hsa:5530%09red/hsa:4790%09red
Non-alcoholic fatty liver disease (NAFLD)	KEGG PATHWAY	hsa04932	6	151	0.570147868722	0.946767478363	ENSG00000181929|ENSG00000107643|ENSG00000106617|ENSG00000142208|ENSG00000186951|ENSG00000109320	hsa:5571|hsa:5599|hsa:51422|hsa:207|hsa:5465|hsa:4790|	5571|5599|51422|207|5465|4790|	http://www.genome.jp/kegg-bin/show_pathway?hsa04932/hsa:5571%09red/hsa:4790%09red/hsa:51422%09red/hsa:5599%09red/hsa:5465%09red/hsa:207%09red
Ras signaling pathway	KEGG PATHWAY	hsa04014	9	228	0.570239780901	0.946767478363	ENSG00000107643|ENSG00000067560|ENSG00000172354|ENSG00000160271|ENSG00000142208|ENSG00000160867|ENSG00000066468|ENSG00000198668|ENSG00000109320	hsa:5599|hsa:387|hsa:2783|hsa:5900|hsa:207|hsa:2264|hsa:2263|hsa:805|hsa:4790|	5599|387|2783|5900|207|2264|2263|805|4790|	http://www.genome.jp/kegg-bin/show_pathway?hsa04014/hsa:5900%09red/hsa:805%09red/hsa:2783%09red/hsa:4790%09red/hsa:2264%09red/hsa:5599%09red/hsa:2263%09red/hsa:207%09red/hsa:387%09red
Sphingolipid metabolism	KEGG PATHWAY	hsa00600	2	47	0.570378331381	0.946767478363	ENSG00000164023|ENSG00000177628	hsa:166929|hsa:2629|	166929|2629|	http://www.genome.jp/kegg-bin/show_pathway?hsa00600/hsa:166929%09red/hsa:2629%09red
Focal adhesion	KEGG PATHWAY	hsa04510	8	203	0.573512861755	0.946767478363	ENSG00000160007|ENSG00000107643|ENSG00000067560|ENSG00000101966|ENSG00000142208|ENSG00000100852|ENSG00000134318|ENSG00000053747	hsa:2909|hsa:5599|hsa:387|hsa:331|hsa:207|hsa:394|hsa:9475|hsa:3909|	2909|5599|387|331|207|394|9475|3909|	http://www.genome.jp/kegg-bin/show_pathway?hsa04510/hsa:5599%09red/hsa:9475%09red/hsa:2909%09red/hsa:394%09red/hsa:331%09red/hsa:207%09red/hsa:387%09red/hsa:3909%09red
Melanogenesis	KEGG PATHWAY	hsa04916	4	100	0.575549154358	0.946767478363	ENSG00000198668|ENSG00000148660|ENSG00000138031|ENSG00000081059	hsa:805|hsa:818|hsa:109|hsa:6932|	805|818|109|6932|	http://www.genome.jp/kegg-bin/show_pathway?hsa04916/hsa:109%09red/hsa:6932%09red/hsa:805%09red/hsa:818%09red
Type II diabetes mellitus	KEGG PATHWAY	hsa04930	2	48	0.581425678957	0.946767478363	ENSG00000107643|ENSG00000067606	hsa:5599|hsa:5590|	5599|5590|	http://www.genome.jp/kegg-bin/show_pathway?hsa04930/hsa:5599%09red/hsa:5590%09red
Tuberculosis	KEGG PATHWAY	hsa05152	7	179	0.583240725067	0.946767478363	ENSG00000107643|ENSG00000067560|ENSG00000142208|ENSG00000148660|ENSG00000198668|ENSG00000138814|ENSG00000109320	hsa:5599|hsa:387|hsa:207|hsa:818|hsa:805|hsa:5530|hsa:4790|	5599|387|207|818|805|5530|4790|	http://www.genome.jp/kegg-bin/show_pathway?hsa05152/hsa:805%09red/hsa:5530%09red/hsa:818%09red/hsa:4790%09red/hsa:5599%09red/hsa:207%09red/hsa:387%09red
Transcriptional misregulation in cancer	KEGG PATHWAY	hsa05202	7	180	0.588921735079	0.948420064483	ENSG00000136997|ENSG00000164120|ENSG00000178573|ENSG00000172493|ENSG00000109320|ENSG00000196591|ENSG00000163513	hsa:4609|hsa:3248|hsa:4094|hsa:4299|hsa:4790|hsa:3066|hsa:7048|	4609|3248|4094|4299|4790|3066|7048|	http://www.genome.jp/kegg-bin/show_pathway?hsa05202/hsa:3248%09red/hsa:4790%09red/hsa:4094%09red/hsa:4299%09red/hsa:3066%09red/hsa:4609%09red/hsa:7048%09red
N-Glycan biosynthesis	KEGG PATHWAY	hsa00510	2	49	0.592262318749	0.948420064483	ENSG00000115275|ENSG00000244038	hsa:7841|hsa:1650|	7841|1650|	http://www.genome.jp/kegg-bin/show_pathway?hsa00510/hsa:1650%09red/hsa:7841%09red
Terpenoid backbone biosynthesis	KEGG PATHWAY	hsa00900	1	22	0.596677358735	0.949077409531	ENSG00000164494	hsa:57107|	57107|	http://www.genome.jp/kegg-bin/show_pathway?hsa00900/hsa:57107%09red
Arginine and proline metabolism	KEGG PATHWAY	hsa00330	2	50	0.602888001742	0.952563042752	ENSG00000164904|ENSG00000122884	hsa:501|hsa:5033|	501|5033|	http://www.genome.jp/kegg-bin/show_pathway?hsa00330/hsa:5033%09red/hsa:501%09red
Antigen processing and presentation	KEGG PATHWAY	hsa04612	3	78	0.61134880037	0.959534209852	ENSG00000131467|ENSG00000204389|ENSG00000164733	hsa:10197|hsa:3304|hsa:1508|	10197|3304|1508|	http://www.genome.jp/kegg-bin/show_pathway?hsa04612/hsa:1508%09red/hsa:3304%09red/hsa:10197%09red
Vitamin digestion and absorption	KEGG PATHWAY	hsa04977	1	24	0.627312100388	0.971718743738	ENSG00000076351	hsa:113235|	113235|	http://www.genome.jp/kegg-bin/show_pathway?hsa04977/hsa:113235%09red
Histidine metabolism	KEGG PATHWAY	hsa00340	1	24	0.627312100388	0.971718743738	ENSG00000164904	hsa:501|	501|	http://www.genome.jp/kegg-bin/show_pathway?hsa00340/hsa:501%09red
Measles	KEGG PATHWAY	hsa05162	5	136	0.64069902575	0.977247906098	ENSG00000185507|ENSG00000078900|ENSG00000142208|ENSG00000204389|ENSG00000109320	hsa:3665|hsa:7161|hsa:207|hsa:3304|hsa:4790|	3665|7161|207|3304|4790|	http://www.genome.jp/kegg-bin/show_pathway?hsa05162/hsa:3304%09red/hsa:7161%09red/hsa:3665%09red/hsa:207%09red/hsa:4790%09red
Glycosylphosphatidylinositol(GPI)-anchor biosynthesis	KEGG PATHWAY	hsa00563	1	25	0.641746317963	0.977247906098	ENSG00000174227	hsa:54872|	54872|	http://www.genome.jp/kegg-bin/show_pathway?hsa00563/hsa:54872%09red
Basal cell carcinoma	KEGG PATHWAY	hsa05217	2	55	0.652865373596	0.977247906098	ENSG00000134982|ENSG00000081059	hsa:324|hsa:6932|	324|6932|	http://www.genome.jp/kegg-bin/show_pathway?hsa05217/hsa:6932%09red/hsa:324%09red
Legionellosis	KEGG PATHWAY	hsa05134	2	55	0.652865373596	0.977247906098	ENSG00000204389|ENSG00000109320	hsa:3304|hsa:4790|	3304|4790|	http://www.genome.jp/kegg-bin/show_pathway?hsa05134/hsa:3304%09red/hsa:4790%09red
Cholinergic synapse	KEGG PATHWAY	hsa04725	4	111	0.654606231781	0.977247906098	ENSG00000172354|ENSG00000148660|ENSG00000138031|ENSG00000142208	hsa:2783|hsa:818|hsa:109|hsa:207|	2783|818|109|207|	http://www.genome.jp/kegg-bin/show_pathway?hsa04725/hsa:2783%09red/hsa:109%09red/hsa:207%09red/hsa:818%09red
Glycosphingolipid biosynthesis - lacto and neolacto series	KEGG PATHWAY	hsa00601	1	26	0.655622012952	0.977247906098	ENSG00000121578	hsa:8702|	8702|	http://www.genome.jp/kegg-bin/show_pathway?hsa00601/hsa:8702%09red
Regulation of lipolysis in adipocytes	KEGG PATHWAY	hsa04923	2	56	0.662237112072	0.977822785886	ENSG00000142208|ENSG00000138031	hsa:207|hsa:109|	207|109|	http://www.genome.jp/kegg-bin/show_pathway?hsa04923/hsa:109%09red/hsa:207%09red
Ascorbate and aldarate metabolism	KEGG PATHWAY	hsa00053	1	27	0.668960777082	0.977822785886	ENSG00000164904	hsa:501|	501|	http://www.genome.jp/kegg-bin/show_pathway?hsa00053/hsa:501%09red
Phototransduction	KEGG PATHWAY	hsa04744	1	27	0.668960777082	0.977822785886	ENSG00000198668	hsa:805|	805|	http://www.genome.jp/kegg-bin/show_pathway?hsa04744/hsa:805%09red
Glutamatergic synapse	KEGG PATHWAY	hsa04724	4	114	0.674364204525	0.977822785886	ENSG00000172354|ENSG00000111371|ENSG00000138814|ENSG00000138031	hsa:2783|hsa:81539|hsa:5530|hsa:109|	2783|81539|5530|109|	http://www.genome.jp/kegg-bin/show_pathway?hsa04724/hsa:2783%09red/hsa:109%09red/hsa:81539%09red/hsa:5530%09red
Steroid hormone biosynthesis	KEGG PATHWAY	hsa00140	2	58	0.680368389796	0.977822785886	ENSG00000137869|ENSG00000140465	hsa:1588|hsa:1543|	1588|1543|	http://www.genome.jp/kegg-bin/show_pathway?hsa00140/hsa:1588%09red/hsa:1543%09red
Dorso-ventral axis formation	KEGG PATHWAY	hsa04320	1	28	0.681783368143	0.977822785886	ENSG00000137449	hsa:132864|	132864|	http://www.genome.jp/kegg-bin/show_pathway?hsa04320/hsa:132864%09red
GABAergic synapse	KEGG PATHWAY	hsa04727	3	88	0.689014368113	0.977822785886	ENSG00000172354|ENSG00000111371|ENSG00000138031	hsa:2783|hsa:81539|hsa:109|	2783|81539|109|	http://www.genome.jp/kegg-bin/show_pathway?hsa04727/hsa:2783%09red/hsa:109%09red/hsa:81539%09red
Gap junction	KEGG PATHWAY	hsa04540	3	88	0.689014368113	0.977822785886	ENSG00000127824|ENSG00000104067|ENSG00000138031	hsa:7277|hsa:7082|hsa:109|	7277|7082|109|	http://www.genome.jp/kegg-bin/show_pathway?hsa04540/hsa:109%09red/hsa:7277%09red/hsa:7082%09red
Nicotinate and nicotinamide metabolism	KEGG PATHWAY	hsa00760	1	30	0.705959084376	0.980721805521	ENSG00000122643	hsa:51251|	51251|	http://www.genome.jp/kegg-bin/show_pathway?hsa00760/hsa:51251%09red
Vascular smooth muscle contraction	KEGG PATHWAY	hsa04270	4	120	0.711485328889	0.980721805521	ENSG00000134318|ENSG00000198668|ENSG00000138031|ENSG00000067560	hsa:9475|hsa:805|hsa:109|hsa:387|	9475|805|109|387|	http://www.genome.jp/kegg-bin/show_pathway?hsa04270/hsa:109%09red/hsa:805%09red/hsa:387%09red/hsa:9475%09red
Mucin type O-Glycan biosynthesis	KEGG PATHWAY	hsa00512	1	31	0.717349838907	0.980721805521	ENSG00000171155	hsa:29071|	29071|	http://www.genome.jp/kegg-bin/show_pathway?hsa00512/hsa:29071%09red
Galactose metabolism	KEGG PATHWAY	hsa00052	1	31	0.717349838907	0.980721805521	ENSG00000171298	hsa:2548|	2548|	http://www.genome.jp/kegg-bin/show_pathway?hsa00052/hsa:2548%09red
beta-Alanine metabolism	KEGG PATHWAY	hsa00410	1	31	0.717349838907	0.980721805521	ENSG00000164904	hsa:501|	501|	http://www.genome.jp/kegg-bin/show_pathway?hsa00410/hsa:501%09red
Fc gamma R-mediated phagocytosis	KEGG PATHWAY	hsa04666	3	93	0.723222553306	0.980721805521	ENSG00000151693|ENSG00000142208|ENSG00000108443	hsa:8853|hsa:207|hsa:6198|	8853|207|6198|	http://www.genome.jp/kegg-bin/show_pathway?hsa04666/hsa:8853%09red/hsa:207%09red/hsa:6198%09red
Alcoholism	KEGG PATHWAY	hsa05034	6	179	0.72515905992	0.980721805521	ENSG00000172354|ENSG00000112759|ENSG00000004660|ENSG00000196591|ENSG00000198668|ENSG00000270882	hsa:2783|hsa:2030|hsa:84254|hsa:3066|hsa:805|hsa:554313|	2783|2030|84254|3066|805|554313|	http://www.genome.jp/kegg-bin/show_pathway?hsa05034/hsa:805%09red/hsa:2030%09red/hsa:2783%09red/hsa:84254%09red/hsa:3066%09red/hsa:554313%09red
RNA polymerase	KEGG PATHWAY	hsa03020	1	32	0.728299737433	0.980721805521	ENSG00000058600	hsa:55718|	55718|	http://www.genome.jp/kegg-bin/show_pathway?hsa03020/hsa:55718%09red
Propanoate metabolism	KEGG PATHWAY	hsa00640	1	32	0.728299737433	0.980721805521	ENSG00000278540	hsa:31|	31|	http://www.genome.jp/kegg-bin/show_pathway?hsa00640/hsa:31%09red
Fructose and mannose metabolism	KEGG PATHWAY	hsa00051	1	33	0.738825826649	0.989275259411	ENSG00000112699	hsa:2762|	2762|	http://www.genome.jp/kegg-bin/show_pathway?hsa00051/hsa:2762%09red
Inflammatory bowel disease (IBD)	KEGG PATHWAY	hsa05321	2	66	0.745042042517	0.991994180205	ENSG00000178573|ENSG00000109320	hsa:4094|hsa:4790|	4094|4790|	http://www.genome.jp/kegg-bin/show_pathway?hsa05321/hsa:4094%09red/hsa:4790%09red
Glycolysis / Gluconeogenesis	KEGG PATHWAY	hsa00010	2	67	0.752283915628	0.996040715106	ENSG00000164904|ENSG00000117448	hsa:501|hsa:10327|	501|10327|	http://www.genome.jp/kegg-bin/show_pathway?hsa00010/hsa:10327%09red/hsa:501%09red
Fc epsilon RI signaling pathway	KEGG PATHWAY	hsa04664	2	68	0.759347765024	0.999468405613	ENSG00000107643|ENSG00000142208	hsa:5599|hsa:207|	5599|207|	http://www.genome.jp/kegg-bin/show_pathway?hsa04664/hsa:207%09red/hsa:5599%09red
Pentose and glucuronate interconversions	KEGG PATHWAY	hsa00040	1	36	0.76802197879	0.999468405613	ENSG00000117448	hsa:10327|	10327|	http://www.genome.jp/kegg-bin/show_pathway?hsa00040/hsa:10327%09red
DNA replication	KEGG PATHWAY	hsa03030	1	36	0.76802197879	0.999468405613	ENSG00000112118	hsa:4172|	4172|	http://www.genome.jp/kegg-bin/show_pathway?hsa03030/hsa:4172%09red
Retrograde endocannabinoid signaling	KEGG PATHWAY	hsa04723	3	101	0.771741427119	0.999468405613	ENSG00000172354|ENSG00000107643|ENSG00000138031	hsa:2783|hsa:5599|hsa:109|	2783|5599|109|	http://www.genome.jp/kegg-bin/show_pathway?hsa04723/hsa:2783%09red/hsa:109%09red/hsa:5599%09red
Bile secretion	KEGG PATHWAY	hsa04976	2	71	0.779500554977	0.999500046886	ENSG00000130164|ENSG00000138031	hsa:3949|hsa:109|	3949|109|	http://www.genome.jp/kegg-bin/show_pathway?hsa04976/hsa:109%09red/hsa:3949%09red
Aldosterone-regulated sodium reabsorption	KEGG PATHWAY	hsa04960	1	39	0.79395712677	0.999500046886	ENSG00000049759	hsa:23327|	23327|	http://www.genome.jp/kegg-bin/show_pathway?hsa04960/hsa:23327%09red
Arrhythmogenic right ventricular cardiomyopathy (ARVC)	KEGG PATHWAY	hsa05412	2	74	0.798158264636	0.999500046886	ENSG00000170558|ENSG00000081059	hsa:1000|hsa:6932|	1000|6932|	http://www.genome.jp/kegg-bin/show_pathway?hsa05412/hsa:6932%09red/hsa:1000%09red
Biosynthesis of amino acids	KEGG PATHWAY	hsa01230	2	75	0.804059461558	0.999500046886	ENSG00000164904|ENSG00000105552	hsa:501|hsa:587|	501|587|	http://www.genome.jp/kegg-bin/show_pathway?hsa01230/hsa:587%09red/hsa:501%09red
Bladder cancer	KEGG PATHWAY	hsa05219	1	41	0.809616992247	0.999500046886	ENSG00000136997	hsa:4609|	4609|	http://www.genome.jp/kegg-bin/show_pathway?hsa05219/hsa:4609%09red
RNA degradation	KEGG PATHWAY	hsa03018	2	77	0.815403167464	0.999500046886	ENSG00000113300|ENSG00000111596	hsa:57472|hsa:4848|	57472|4848|	http://www.genome.jp/kegg-bin/show_pathway?hsa03018/hsa:4848%09red/hsa:57472%09red
Bacterial invasion of epithelial cells	KEGG PATHWAY	hsa05100	2	78	0.820851794235	0.999500046886	ENSG00000184640|ENSG00000067560	hsa:10801|hsa:387|	10801|387|	http://www.genome.jp/kegg-bin/show_pathway?hsa05100/hsa:387%09red/hsa:10801%09red
Fatty acid degradation	KEGG PATHWAY	hsa00071	1	44	0.830905616072	0.999500046886	ENSG00000164904	hsa:501|	501|	http://www.genome.jp/kegg-bin/show_pathway?hsa00071/hsa:501%09red
Cell adhesion molecules (CAMs)	KEGG PATHWAY	hsa04514	4	146	0.836603012341	0.999500046886	ENSG00000116815|ENSG00000067141|ENSG00000170558|ENSG00000154654	hsa:965|hsa:4756|hsa:1000|hsa:4685|	965|4756|1000|4685|	http://www.genome.jp/kegg-bin/show_pathway?hsa04514/hsa:965%09red/hsa:4756%09red/hsa:4685%09red/hsa:1000%09red
ABC transporters	KEGG PATHWAY	hsa02010	1	45	0.837459515828	0.999500046886	ENSG00000064687	hsa:10347|	10347|	http://www.genome.jp/kegg-bin/show_pathway?hsa02010/hsa:10347%09red
Cysteine and methionine metabolism	KEGG PATHWAY	hsa00270	1	45	0.837459515828	0.999500046886	ENSG00000105552	hsa:587|	587|	http://www.genome.jp/kegg-bin/show_pathway?hsa00270/hsa:587%09red
ECM-receptor interaction	KEGG PATHWAY	hsa04512	2	82	0.841228987063	0.999500046886	ENSG00000072571|ENSG00000053747	hsa:3161|hsa:3909|	3161|3909|	http://www.genome.jp/kegg-bin/show_pathway?hsa04512/hsa:3161%09red/hsa:3909%09red
Carbohydrate digestion and absorption	KEGG PATHWAY	hsa04973	1	46	0.843759628244	0.999500046886	ENSG00000142208	hsa:207|	207|	http://www.genome.jp/kegg-bin/show_pathway?hsa04973/hsa:207%09red
Hypertrophic cardiomyopathy (HCM)	KEGG PATHWAY	hsa05410	2	83	0.845983966617	0.999500046886	ENSG00000106617|ENSG00000181929	hsa:51422|hsa:5571|	51422|5571|	http://www.genome.jp/kegg-bin/show_pathway?hsa05410/hsa:5571%09red/hsa:51422%09red
Calcium signaling pathway	KEGG PATHWAY	hsa04020	5	180	0.847161430633	0.999500046886	ENSG00000070961|ENSG00000198668|ENSG00000148660|ENSG00000138031|ENSG00000138814	hsa:490|hsa:805|hsa:818|hsa:109|hsa:5530|	490|805|818|109|5530|	http://www.genome.jp/kegg-bin/show_pathway?hsa04020/hsa:109%09red/hsa:490%09red/hsa:805%09red/hsa:5530%09red/hsa:818%09red
Nucleotide excision repair	KEGG PATHWAY	hsa03420	1	47	0.849815771686	0.999500046886	ENSG00000158290	hsa:8450|	8450|	http://www.genome.jp/kegg-bin/show_pathway?hsa03420/hsa:8450%09red
Endocrine and other factor-regulated calcium reabsorption	KEGG PATHWAY	hsa04961	1	47	0.849815771686	0.999500046886	ENSG00000070961	hsa:490|	490|	http://www.genome.jp/kegg-bin/show_pathway?hsa04961/hsa:490%09red
Insulin secretion	KEGG PATHWAY	hsa04911	2	85	0.85510742768	0.999500046886	ENSG00000148660|ENSG00000138031	hsa:818|hsa:109|	818|109|	http://www.genome.jp/kegg-bin/show_pathway?hsa04911/hsa:109%09red/hsa:818%09red
Fatty acid metabolism	KEGG PATHWAY	hsa01212	1	48	0.855637385026	0.999500046886	ENSG00000278540	hsa:31|	31|	http://www.genome.jp/kegg-bin/show_pathway?hsa01212/hsa:31%09red
Malaria	KEGG PATHWAY	hsa05144	1	49	0.861233542293	0.999500046886	ENSG00000108691	hsa:6347|	6347|	http://www.genome.jp/kegg-bin/show_pathway?hsa05144/hsa:6347%09red
Cocaine addiction	KEGG PATHWAY	hsa05030	1	49	0.861233542293	0.999500046886	ENSG00000109320	hsa:4790|	4790|	http://www.genome.jp/kegg-bin/show_pathway?hsa05030/hsa:4790%09red
mTOR signaling pathway	KEGG PATHWAY	hsa04150	4	154	0.864546454058	0.999500046886	ENSG00000130779|ENSG00000067560|ENSG00000108443|ENSG00000142208	hsa:6249|hsa:387|hsa:6198|hsa:207|	6249|387|6198|207|	http://www.genome.jp/kegg-bin/show_pathway?hsa04150/hsa:207%09red/hsa:387%09red/hsa:6198%09red/hsa:6249%09red
Ribosome biogenesis in eukaryotes	KEGG PATHWAY	hsa03008	2	89	0.871888827931	0.999991754686	ENSG00000105171|ENSG00000070814	hsa:10775|hsa:6949|	10775|6949|	http://www.genome.jp/kegg-bin/show_pathway?hsa03008/hsa:10775%09red/hsa:6949%09red
PI3K-Akt signaling pathway	KEGG PATHWAY	hsa04151	10	342	0.877875002991	0.999991754686	ENSG00000074211|ENSG00000172354|ENSG00000142208|ENSG00000108443|ENSG00000136997|ENSG00000160867|ENSG00000066468|ENSG00000053747|ENSG00000118689|ENSG00000109320	hsa:5522|hsa:2783|hsa:207|hsa:6198|hsa:4609|hsa:2264|hsa:2263|hsa:3909|hsa:2309|hsa:4790|	5522|2783|207|6198|4609|2264|2263|3909|2309|4790|	http://www.genome.jp/kegg-bin/show_pathway?hsa04151/hsa:5522%09red/hsa:6198%09red/hsa:2783%09red/hsa:4790%09red/hsa:2264%09red/hsa:2263%09red/hsa:4609%09red/hsa:207%09red/hsa:2309%09red/hsa:3909%09red
Fanconi anemia pathway	KEGG PATHWAY	hsa03460	1	55	0.890541522787	0.999991754686	ENSG00000076242	hsa:4292|	4292|	http://www.genome.jp/kegg-bin/show_pathway?hsa03460/hsa:4292%09red
Starch and sucrose metabolism	KEGG PATHWAY	hsa00500	1	57	0.898865540222	0.999991754686	ENSG00000171298	hsa:2548|	2548|	http://www.genome.jp/kegg-bin/show_pathway?hsa00500/hsa:2548%09red
Spliceosome	KEGG PATHWAY	hsa03040	3	134	0.903601660603	0.999991754686	ENSG00000100813|ENSG00000204389|ENSG00000168438	hsa:22985|hsa:3304|hsa:51362|	22985|3304|51362|	http://www.genome.jp/kegg-bin/show_pathway?hsa03040/hsa:3304%09red/hsa:51362%09red/hsa:22985%09red
Amoebiasis	KEGG PATHWAY	hsa05146	2	100	0.9092282505	0.999991754686	ENSG00000053747|ENSG00000109320	hsa:3909|hsa:4790|	3909|4790|	http://www.genome.jp/kegg-bin/show_pathway?hsa05146/hsa:4790%09red/hsa:3909%09red
Viral myocarditis	KEGG PATHWAY	hsa05416	1	60	0.91018085654	0.999991754686	ENSG00000075151	hsa:8672|	8672|	http://www.genome.jp/kegg-bin/show_pathway?hsa05416/hsa:8672%09red
MicroRNAs in cancer	KEGG PATHWAY	hsa05206	8	299	0.910699930548	0.999991754686	ENSG00000169946|ENSG00000067560|ENSG00000137710|ENSG00000104081|ENSG00000136997|ENSG00000134982|ENSG00000092820|ENSG00000109320	hsa:23414|hsa:387|hsa:5962|hsa:90427|hsa:4609|hsa:324|hsa:7430|hsa:4790|	23414|387|5962|90427|4609|324|7430|4790|	http://www.genome.jp/kegg-bin/show_pathway?hsa05206/hsa:90427%09red/hsa:23414%09red/hsa:4790%09red/hsa:5962%09red/hsa:7430%09red/hsa:4609%09red/hsa:324%09red/hsa:387%09red
Ribosome	KEGG PATHWAY	hsa03010	3	138	0.913690982554	0.999991754686	ENSG00000174547|ENSG00000231500|ENSG00000163682	hsa:65003|hsa:6222|hsa:6133|	65003|6222|6133|	http://www.genome.jp/kegg-bin/show_pathway?hsa03010/hsa:6133%09red/hsa:65003%09red/hsa:6222%09red
Arachidonic acid metabolism	KEGG PATHWAY	hsa00590	1	62	0.917012601231	0.999991754686	ENSG00000148334	hsa:80142|	80142|	http://www.genome.jp/kegg-bin/show_pathway?hsa00590/hsa:80142%09red
Purine metabolism	KEGG PATHWAY	hsa00230	4	176	0.921174694985	0.999991754686	ENSG00000122643|ENSG00000058600|ENSG00000073417|ENSG00000138031	hsa:51251|hsa:55718|hsa:5151|hsa:109|	51251|55718|5151|109|	http://www.genome.jp/kegg-bin/show_pathway?hsa00230/hsa:51251%09red/hsa:109%09red/hsa:5151%09red/hsa:55718%09red
Pyrimidine metabolism	KEGG PATHWAY	hsa00240	2	105	0.922590987172	0.999991754686	ENSG00000122643|ENSG00000058600	hsa:51251|hsa:55718|	51251|55718|	http://www.genome.jp/kegg-bin/show_pathway?hsa00240/hsa:51251%09red/hsa:55718%09red
Retinol metabolism	KEGG PATHWAY	hsa00830	1	65	0.926299212433	0.999991754686	ENSG00000140465	hsa:1543|	1543|	http://www.genome.jp/kegg-bin/show_pathway?hsa00830/hsa:1543%09red
Thyroid hormone synthesis	KEGG PATHWAY	hsa04918	1	71	0.941873458452	0.999991754686	ENSG00000138031	hsa:109|	109|	http://www.genome.jp/kegg-bin/show_pathway?hsa04918/hsa:109%09red
Melanoma	KEGG PATHWAY	hsa05218	1	71	0.941873458452	0.999991754686	ENSG00000142208	hsa:207|	207|	http://www.genome.jp/kegg-bin/show_pathway?hsa05218/hsa:207%09red
PPAR signaling pathway	KEGG PATHWAY	hsa03320	1	72	0.944128637667	0.999991754686	ENSG00000186951	hsa:5465|	5465|	http://www.genome.jp/kegg-bin/show_pathway?hsa03320/hsa:5465%09red
Metabolism of xenobiotics by cytochrome P450	KEGG PATHWAY	hsa00980	1	73	0.946296401632	0.999991754686	ENSG00000140465	hsa:1543|	1543|	http://www.genome.jp/kegg-bin/show_pathway?hsa00980/hsa:1543%09red
Leishmaniasis	KEGG PATHWAY	hsa05140	1	74	0.948380135611	0.999991754686	ENSG00000109320	hsa:4790|	4790|	http://www.genome.jp/kegg-bin/show_pathway?hsa05140/hsa:4790%09red
Chemical carcinogenesis	KEGG PATHWAY	hsa05204	1	82	0.962390188207	0.999991754686	ENSG00000140465	hsa:1543|	1543|	http://www.genome.jp/kegg-bin/show_pathway?hsa05204/hsa:1543%09red
Natural killer cell mediated cytotoxicity	KEGG PATHWAY	hsa04650	2	135	0.971040499393	0.999991754686	ENSG00000155918|ENSG00000138814	hsa:154064|hsa:5530|	154064|5530|	http://www.genome.jp/kegg-bin/show_pathway?hsa04650/hsa:154064%09red/hsa:5530%09red
Dilated cardiomyopathy	KEGG PATHWAY	hsa05414	1	90	0.972600433303	0.999991754686	ENSG00000138031	hsa:109|	109|	http://www.genome.jp/kegg-bin/show_pathway?hsa05414/hsa:109%09red
Rheumatoid arthritis	KEGG PATHWAY	hsa05323	1	91	0.973664226784	0.999991754686	ENSG00000108691	hsa:6347|	6347|	http://www.genome.jp/kegg-bin/show_pathway?hsa05323/hsa:6347%09red
Metabolic pathways	KEGG PATHWAY	hsa01100	37	1243	0.97726158302	0.999991754686	ENSG00000122884|ENSG00000087053|ENSG00000171298|ENSG00000078269|ENSG00000177628|ENSG00000015532|ENSG00000121578|ENSG00000164023|ENSG00000059691|ENSG00000065357|ENSG00000116133|ENSG00000140465|ENSG00000070614|ENSG00000100605|ENSG00000120254|ENSG00000065911|ENSG00000244038|ENSG00000105552|ENSG00000159921|ENSG00000112699|ENSG00000148334|ENSG00000158578|ENSG00000278540|ENSG00000149091|ENSG00000164904…	hsa:5033|hsa:8898|hsa:2548|hsa:8871|hsa:2629|hsa:64132|hsa:8702|hsa:166929|hsa:5188|hsa:1606|hsa:1718|hsa:1543|hsa:3340|hsa:3705|hsa:25902|hsa:10797|hsa:1650|hsa:587|hsa:10020|hsa:2762|hsa:80142|hsa:212|hsa:31|hsa:8525|hsa:501|hsa:80347|hsa:7841|hsa:5051|hsa:1588|hsa:6309|hsa:10327|hsa:5428|hsa:51251|hsa:3909|hsa:23646|hsa:29071|hsa:5860|	5033|8898|2548|8871|2629|64132|8702|166929|5188|1606|1718|1543|3340|3705|25902|10797|1650|587|10020|2762|80142|212|31|8525|501|80347|7841|5051|1588|6309|10327|5428|51251|3909|23646|29071|5860|	http://www.genome.jp/kegg-bin/show_pathway?hsa01100/hsa:10797%09red/hsa:166929%09red/hsa:23646%09red/hsa:3705%09red/hsa:29071%09red/hsa:212%09red/hsa:1543%09red/hsa:5860%09red/hsa:1650%09red/hsa:8525%09red/hsa:2762%09red/hsa:8871%09red/hsa:80347%09red/hsa:1588%09red/hsa:6309%09red/hsa:10327%09red/hsa:2548%09red/hsa:8702%09red/hsa:5051%09red/hsa:8898%09red/hsa:25902%09red/hsa:587%09red/hsa:5033%09…
Huntington's disease	KEGG PATHWAY	hsa05016	3	193	0.982849661026	0.999991754686	ENSG00000175203|ENSG00000141384|ENSG00000196591	hsa:10540|hsa:6875|hsa:3066|	10540|6875|3066|	http://www.genome.jp/kegg-bin/show_pathway?hsa05016/hsa:6875%09red/hsa:10540%09red/hsa:3066%09red
Phagosome	KEGG PATHWAY	hsa04145	2	155	0.985275366568	0.999991754686	ENSG00000187240|ENSG00000127824	hsa:79659|hsa:7277|	79659|7277|	http://www.genome.jp/kegg-bin/show_pathway?hsa04145/hsa:7277%09red/hsa:79659%09red
Jak-STAT signaling pathway	KEGG PATHWAY	hsa04630	2	158	0.986711497042	0.999991754686	ENSG00000136997|ENSG00000142208	hsa:4609|hsa:207|	4609|207|	http://www.genome.jp/kegg-bin/show_pathway?hsa04630/hsa:4609%09red/hsa:207%09red
Serotonergic synapse	KEGG PATHWAY	hsa04726	1	112	0.98853840387	0.999991754686	ENSG00000172354	hsa:2783|	2783|	http://www.genome.jp/kegg-bin/show_pathway?hsa04726/hsa:2783%09red
Alzheimer's disease	KEGG PATHWAY	hsa05010	2	168	0.990579674133	0.999991754686	ENSG00000198668|ENSG00000138814	hsa:805|hsa:5530|	805|5530|	http://www.genome.jp/kegg-bin/show_pathway?hsa05010/hsa:805%09red/hsa:5530%09red
Systemic lupus erythematosus	KEGG PATHWAY	hsa05322	1	136	0.995574356053	0.999991754686	ENSG00000270882	hsa:554313|	554313|	http://www.genome.jp/kegg-bin/show_pathway?hsa05322/hsa:554313%09red
Cytokine-cytokine receptor interaction	KEGG PATHWAY	hsa04060	3	265	0.998282343896	0.999991754686	ENSG00000108691|ENSG00000106799|ENSG00000163513	hsa:6347|hsa:7046|hsa:7048|	6347|7046|7048|	http://www.genome.jp/kegg-bin/show_pathway?hsa04060/hsa:6347%09red/hsa:7046%09red/hsa:7048%09red
Neuroactive ligand-receptor interaction	KEGG PATHWAY	hsa04080	1	278	0.999984402414	0.999991754686	ENSG00000196689	hsa:7442|	7442|	http://www.genome.jp/kegg-bin/show_pathway?hsa04080/hsa:7442%09red
Olfactory transduction	KEGG PATHWAY	hsa04740	3	420	0.999991754686	0.999991754686	ENSG00000198668|ENSG00000148660|ENSG00000138031	hsa:805|hsa:818|hsa:109|	805|818|109|	http://www.genome.jp/kegg-bin/show_pathway?hsa04740/hsa:109%09red/hsa:805%09red/hsa:818%09red
--------------------
#Term	Database	ID	Input number	Background number	P-Value	Corrected P-Value	Input	KEGG_ID/KO	Entrez_ID	Hyperlink
--------------------
#Term	Database	ID	Input number	Background number	P-Value	Corrected P-Value	Input	KEGG_ID/KO	Entrez_ID	Hyperlink
--------------------
